# Supplementary material for: Predicting hourly traffic volume of urban signal intersections using Dynamically Weighted LightGBM
Source: Research Square preprint supplement (doi:10.21203/rs.3.rs-7976576/v1), 2026-01-14
Supplement: Supplementary file 1 [file 70cb454af399b69c93929740.xlsx]

## Sheet: Sheet1
date	weekday	has_limit	hour	volume	has_signal	road_num	cross_type	has_parking	has_gas	has_subway	in_lanes	out_lanes
2024-03-01	5	1	0	14	1	4	1	1	0	0	10	10
2024-03-01	5	1	1	58	1	4	1	1	0	0	10	10
2024-03-01	5	1	2	30	1	4	1	1	0	0	10	10
2024-03-01	5	1	3	31	1	4	1	1	0	0	10	10
2024-03-01	5	1	4	61	1	4	1	1	0	0	10	10
2024-03-01	5	1	5	36	1	4	1	1	0	0	10	10
2024-03-01	5	1	6	332	1	4	1	1	0	0	10	10
2024-03-01	5	1	7	237	1	4	1	1	0	0	10	10
2024-03-01	5	1	8	285	1	4	1	1	0	0	10	10
2024-03-01	5	1	9	358	1	4	1	1	0	0	10	10
2024-03-01	5	1	10	115	1	4	1	1	0	0	10	10
2024-03-01	5	1	11	253	1	4	1	1	0	0	10	10
2024-03-01	5	1	12	241	1	4	1	1	0	0	10	10
2024-03-01	5	1	13	202	1	4	1	1	0	0	10	10
2024-03-01	5	1	14	253	1	4	1	1	0	0	10	10
2024-03-01	5	1	15	138	1	4	1	1	0	0	10	10
2024-03-01	5	1	16	326	1	4	1	1	0	0	10	10
2024-03-01	5	1	17	362	1	4	1	1	0	0	10	10
2024-03-01	5	1	18	132	1	4	1	1	0	0	10	10
2024-03-01	5	1	19	108	1	4	1	1	0	0	10	10
2024-03-01	5	1	20	303	1	4	1	1	0	0	10	10
2024-03-01	5	1	21	310	1	4	1	1	0	0	10	10
2024-03-01	5	1	22	224	1	4	1	1	0	0	10	10
2024-03-01	5	1	23	118	1	4	1	1	0	0	10	10
2024-03-01	5	1	0	55	0	3	4	1	0	0	7	7
2024-03-01	5	1	1	18	0	3	4	1	0	0	7	7
2024-03-01	5	1	2	53	0	3	4	1	0	0	7	7
2024-03-01	5	1	3	11	0	3	4	1	0	0	7	7
2024-03-01	5	1	4	34	0	3	4	1	0	0	7	7
2024-03-01	5	1	5	40	0	3	4	1	0	0	7	7
2024-03-01	5	1	6	70	0	3	4	1	0	0	7	7
2024-03-01	5	1	7	453	0	3	4	1	0	0	7	7
2024-03-01	5	1	8	189	0	3	4	1	0	0	7	7
2024-03-01	5	1	9	250	0	3	4	1	0	0	7	7
2024-03-01	5	1	10	320	0	3	4	1	0	0	7	7
2024-03-01	5	1	11	92	0	3	4	1	0	0	7	7
2024-03-01	5	1	12	114	0	3	4	1	0	0	7	7
2024-03-01	5	1	13	222	0	3	4	1	0	0	7	7
2024-03-01	5	1	14	249	0	3	4	1	0	0	7	7
2024-03-01	5	1	15	185	0	3	4	1	0	0	7	7
2024-03-01	5	1	16	315	0	3	4	1	0	0	7	7
2024-03-01	5	1	17	127	0	3	4	1	0	0	7	7
2024-03-01	5	1	18	323	0	3	4	1	0	0	7	7
2024-03-01	5	1	19	306	0	3	4	1	0	0	7	7
2024-03-01	5	1	20	267	0	3	4	1	0	0	7	7
2024-03-01	5	1	21	159	0	3	4	1	0	0	7	7
2024-03-01	5	1	22	133	0	3	4	1	0	0	7	7
2024-03-01	5	1	23	59	0	3	4	1	0	0	7	7
2024-03-01	5	1	0	17	1	4	1	1	0	0	10	14
2024-03-01	5	1	1	20	1	4	1	1	0	0	10	14
2024-03-01	5	1	2	41	1	4	1	1	0	0	10	14
2024-03-01	5	1	3	72	1	4	1	1	0	0	10	14
2024-03-01	5	1	4	75	1	4	1	1	0	0	10	14
2024-03-01	5	1	5	18	1	4	1	1	0	0	10	14
2024-03-01	5	1	6	442	1	4	1	1	0	0	10	14
2024-03-01	5	1	7	591	1	4	1	1	0	0	10	14
2024-03-01	5	1	8	468	1	4	1	1	0	0	10	14
2024-03-01	5	1	9	408	1	4	1	1	0	0	10	14
2024-03-01	5	1	10	382	1	4	1	1	0	0	10	14
2024-03-01	5	1	11	199	1	4	1	1	0	0	10	14
2024-03-01	5	1	12	196	1	4	1	1	0	0	10	14
2024-03-01	5	1	13	150	1	4	1	1	0	0	10	14
2024-03-01	5	1	14	252	1	4	1	1	0	0	10	14
2024-03-01	5	1	15	415	1	4	1	1	0	0	10	14
2024-03-01	5	1	16	145	1	4	1	1	0	0	10	14
2024-03-01	5	1	17	270	1	4	1	1	0	0	10	14
2024-03-01	5	1	18	165	1	4	1	1	0	0	10	14
2024-03-01	5	1	19	270	1	4	1	1	0	0	10	14
2024-03-01	5	1	20	210	1	4	1	1	0	0	10	14
2024-03-01	5	1	21	81	1	4	1	1	0	0	10	14
2024-03-01	5	1	22	384	1	4	1	1	0	0	10	14
2024-03-01	5	1	23	234	1	4	1	1	0	0	10	14
2024-03-02	6	0	0	29	1	4	1	1	0	0	10	10
2024-03-02	6	0	1	27	1	4	1	1	0	0	10	10
2024-03-02	6	0	2	47	1	4	1	1	0	0	10	10
2024-03-02	6	0	3	82	1	4	1	1	0	0	10	10
2024-03-02	6	0	4	82	1	4	1	1	0	0	10	10
2024-03-02	6	0	5	112	1	4	1	1	0	0	10	10
2024-03-02	6	0	6	379	1	4	1	1	0	0	10	10
2024-03-02	6	0	7	1060	1	4	1	1	0	0	10	10
2024-03-02	6	0	8	453	1	4	1	1	0	0	10	10
2024-03-02	6	0	9	303	1	4	1	1	0	0	10	10
2024-03-02	6	0	10	573	1	4	1	1	0	0	10	10
2024-03-02	6	0	11	553	1	4	1	1	0	0	10	10
2024-03-02	6	0	12	224	1	4	1	1	0	0	10	10
2024-03-02	6	0	13	408	1	4	1	1	0	0	10	10
2024-03-02	6	0	14	428	1	4	1	1	0	0	10	10
2024-03-02	6	0	15	193	1	4	1	1	0	0	10	10
2024-03-02	6	0	16	194	1	4	1	1	0	0	10	10
2024-03-02	6	0	17	484	1	4	1	1	0	0	10	10
2024-03-02	6	0	18	1070	1	4	1	1	0	0	10	10
2024-03-02	6	0	19	175	1	4	1	1	0	0	10	10
2024-03-02	6	0	20	136	1	4	1	1	0	0	10	10
2024-03-02	6	0	21	205	1	4	1	1	0	0	10	10
2024-03-02	6	0	22	222	1	4	1	1	0	0	10	10
2024-03-02	6	0	23	504	1	4	1	1	0	0	10	10
2024-03-02	6	0	0	40	0	3	4	1	0	0	7	7
2024-03-02	6	0	1	75	0	3	4	1	0	0	7	7
2024-03-02	6	0	2	102	0	3	4	1	0	0	7	7
2024-03-02	6	0	3	101	0	3	4	1	0	0	7	7
2024-03-02	6	0	4	100	0	3	4	1	0	0	7	7
2024-03-02	6	0	5	32	0	3	4	1	0	0	7	7
2024-03-02	6	0	6	115	0	3	4	1	0	0	7	7
2024-03-02	6	0	7	347	0	3	4	1	0	0	7	7
2024-03-02	6	0	8	534	0	3	4	1	0	0	7	7
2024-03-02	6	0	9	147	0	3	4	1	0	0	7	7
2024-03-02	6	0	10	503	0	3	4	1	0	0	7	7
2024-03-02	6	0	11	172	0	3	4	1	0	0	7	7
2024-03-02	6	0	12	315	0	3	4	1	0	0	7	7
2024-03-02	6	0	13	115	0	3	4	1	0	0	7	7
2024-03-02	6	0	14	217	0	3	4	1	0	0	7	7
2024-03-02	6	0	15	283	0	3	4	1	0	0	7	7
2024-03-02	6	0	16	224	0	3	4	1	0	0	7	7
2024-03-02	6	0	17	840	0	3	4	1	0	0	7	7
2024-03-02	6	0	18	455	0	3	4	1	0	0	7	7
2024-03-02	6	0	19	550	0	3	4	1	0	0	7	7
2024-03-02	6	0	20	320	0	3	4	1	0	0	7	7
2024-03-02	6	0	21	124	0	3	4	1	0	0	7	7
2024-03-02	6	0	22	299	0	3	4	1	0	0	7	7
2024-03-02	6	0	23	542	0	3	4	1	0	0	7	7
2024-03-02	6	0	0	96	1	4	1	1	0	0	10	14
2024-03-02	6	0	1	45	1	4	1	1	0	0	10	14
2024-03-02	6	0	2	73	1	4	1	1	0	0	10	14
2024-03-02	6	0	3	135	1	4	1	1	0	0	10	14
2024-03-02	6	0	4	81	1	4	1	1	0	0	10	14
2024-03-02	6	0	5	60	1	4	1	1	0	0	10	14
2024-03-02	6	0	6	648	1	4	1	1	0	0	10	14
2024-03-02	6	0	7	600	1	4	1	1	0	0	10	14
2024-03-02	6	0	8	1380	1	4	1	1	0	0	10	14
2024-03-02	6	0	9	481	1	4	1	1	0	0	10	14
2024-03-02	6	0	10	579	1	4	1	1	0	0	10	14
2024-03-02	6	0	11	420	1	4	1	1	0	0	10	14
2024-03-02	6	0	12	333	1	4	1	1	0	0	10	14
2024-03-02	6	0	13	250	1	4	1	1	0	0	10	14
2024-03-02	6	0	14	175	1	4	1	1	0	0	10	14
2024-03-02	6	0	15	493	1	4	1	1	0	0	10	14
2024-03-02	6	0	16	669	1	4	1	1	0	0	10	14
2024-03-02	6	0	17	636	1	4	1	1	0	0	10	14
2024-03-02	6	0	18	426	1	4	1	1	0	0	10	14
2024-03-02	6	0	19	721	1	4	1	1	0	0	10	14
2024-03-02	6	0	20	735	1	4	1	1	0	0	10	14
2024-03-02	6	0	21	567	1	4	1	1	0	0	10	14
2024-03-02	6	0	22	336	1	4	1	1	0	0	10	14
2024-03-02	6	0	23	330	1	4	1	1	0	0	10	14
2024-03-03	7	0	0	28	1	4	1	1	0	0	10	10
2024-03-03	7	0	1	26	1	4	1	1	0	0	10	10
2024-03-03	7	0	2	95	1	4	1	1	0	0	10	10
2024-03-03	7	0	3	101	1	4	1	1	0	0	10	10
2024-03-03	7	0	4	103	1	4	1	1	0	0	10	10
2024-03-03	7	0	5	94	1	4	1	1	0	0	10	10
2024-03-03	7	0	6	583	1	4	1	1	0	0	10	10
2024-03-03	7	0	7	633	1	4	1	1	0	0	10	10
2024-03-03	7	0	8	804	1	4	1	1	0	0	10	10
2024-03-03	7	0	9	330	1	4	1	1	0	0	10	10
2024-03-03	7	0	10	231	1	4	1	1	0	0	10	10
2024-03-03	7	0	11	248	1	4	1	1	0	0	10	10
2024-03-03	7	0	12	291	1	4	1	1	0	0	10	10
2024-03-03	7	0	13	232	1	4	1	1	0	0	10	10
2024-03-03	7	0	14	459	1	4	1	1	0	0	10	10
2024-03-03	7	0	15	426	1	4	1	1	0	0	10	10
2024-03-03	7	0	16	397	1	4	1	1	0	0	10	10
2024-03-03	7	0	17	787	1	4	1	1	0	0	10	10
2024-03-03	7	0	18	758	1	4	1	1	0	0	10	10
2024-03-03	7	0	19	312	1	4	1	1	0	0	10	10
2024-03-03	7	0	20	544	1	4	1	1	0	0	10	10
2024-03-03	7	0	21	228	1	4	1	1	0	0	10	10
2024-03-03	7	0	22	262	1	4	1	1	0	0	10	10
2024-03-03	7	0	23	572	1	4	1	1	0	0	10	10
2024-03-03	7	0	0	57	0	3	4	1	0	0	7	7
2024-03-03	7	0	1	85	0	3	4	1	0	0	7	7
2024-03-03	7	0	2	27	0	3	4	1	0	0	7	7
2024-03-03	7	0	3	51	0	3	4	1	0	0	7	7
2024-03-03	7	0	4	105	0	3	4	1	0	0	7	7
2024-03-03	7	0	5	60	0	3	4	1	0	0	7	7
2024-03-03	7	0	6	359	0	3	4	1	0	0	7	7
2024-03-03	7	0	7	673	0	3	4	1	0	0	7	7
2024-03-03	7	0	8	294	0	3	4	1	0	0	7	7
2024-03-03	7	0	9	170	0	3	4	1	0	0	7	7
2024-03-03	7	0	10	464	0	3	4	1	0	0	7	7
2024-03-03	7	0	11	517	0	3	4	1	0	0	7	7
2024-03-03	7	0	12	282	0	3	4	1	0	0	7	7
2024-03-03	7	0	13	192	0	3	4	1	0	0	7	7
2024-03-03	7	0	14	216	0	3	4	1	0	0	7	7
2024-03-03	7	0	15	149	0	3	4	1	0	0	7	7
2024-03-03	7	0	16	295	0	3	4	1	0	0	7	7
2024-03-03	7	0	17	748	0	3	4	1	0	0	7	7
2024-03-03	7	0	18	442	0	3	4	1	0	0	7	7
2024-03-03	7	0	19	276	0	3	4	1	0	0	7	7
2024-03-03	7	0	20	459	0	3	4	1	0	0	7	7
2024-03-03	7	0	21	137	0	3	4	1	0	0	7	7
2024-03-03	7	0	22	426	0	3	4	1	0	0	7	7
2024-03-03	7	0	23	447	0	3	4	1	0	0	7	7
2024-03-03	7	0	0	97	1	4	1	1	0	0	10	14
2024-03-03	7	0	1	143	1	4	1	1	0	0	10	14
2024-03-03	7	0	2	75	1	4	1	1	0	0	10	14
2024-03-03	7	0	3	43	1	4	1	1	0	0	10	14
2024-03-03	7	0	4	143	1	4	1	1	0	0	10	14
2024-03-03	7	0	5	57	1	4	1	1	0	0	10	14
2024-03-03	7	0	6	160	1	4	1	1	0	0	10	14
2024-03-03	7	0	7	987	1	4	1	1	0	0	10	14
2024-03-03	7	0	8	1200	1	4	1	1	0	0	10	14
2024-03-03	7	0	9	180	1	4	1	1	0	0	10	14
2024-03-03	7	0	10	220	1	4	1	1	0	0	10	14
2024-03-03	7	0	11	390	1	4	1	1	0	0	10	14
2024-03-03	7	0	12	249	1	4	1	1	0	0	10	14
2024-03-03	7	0	13	172	1	4	1	1	0	0	10	14
2024-03-03	7	0	14	741	1	4	1	1	0	0	10	14
2024-03-03	7	0	15	348	1	4	1	1	0	0	10	14
2024-03-03	7	0	16	586	1	4	1	1	0	0	10	14
2024-03-03	7	0	17	1479	1	4	1	1	0	0	10	14
2024-03-03	7	0	18	1221	1	4	1	1	0	0	10	14
2024-03-03	7	0	19	430	1	4	1	1	0	0	10	14
2024-03-03	7	0	20	652	1	4	1	1	0	0	10	14
2024-03-03	7	0	21	522	1	4	1	1	0	0	10	14
2024-03-03	7	0	22	397	1	4	1	1	0	0	10	14
2024-03-03	7	0	23	420	1	4	1	1	0	0	10	14
2024-03-04	1	1	0	48	1	4	1	1	0	0	10	10
2024-03-04	1	1	1	24	1	4	1	1	0	0	10	10
2024-03-04	1	1	2	23	1	4	1	1	0	0	10	10
2024-03-04	1	1	3	22	1	4	1	1	0	0	10	10
2024-03-04	1	1	4	58	1	4	1	1	0	0	10	10
2024-03-04	1	1	5	70	1	4	1	1	0	0	10	10
2024-03-04	1	1	6	171	1	4	1	1	0	0	10	10
2024-03-04	1	1	7	513	1	4	1	1	0	0	10	10
2024-03-04	1	1	8	633	1	4	1	1	0	0	10	10
2024-03-04	1	1	9	261	1	4	1	1	0	0	10	10
2024-03-04	1	1	10	151	1	4	1	1	0	0	10	10
2024-03-04	1	1	11	322	1	4	1	1	0	0	10	10
2024-03-04	1	1	12	291	1	4	1	1	0	0	10	10
2024-03-04	1	1	13	351	1	4	1	1	0	0	10	10
2024-03-04	1	1	14	174	1	4	1	1	0	0	10	10
2024-03-04	1	1	15	84	1	4	1	1	0	0	10	10
2024-03-04	1	1	16	337	1	4	1	1	0	0	10	10
2024-03-04	1	1	17	542	1	4	1	1	0	0	10	10
2024-03-04	1	1	18	578	1	4	1	1	0	0	10	10
2024-03-04	1	1	19	116	1	4	1	1	0	0	10	10
2024-03-04	1	1	20	117	1	4	1	1	0	0	10	10
2024-03-04	1	1	21	121	1	4	1	1	0	0	10	10
2024-03-04	1	1	22	76	1	4	1	1	0	0	10	10
2024-03-04	1	1	23	162	1	4	1	1	0	0	10	10
2024-03-04	1	1	0	56	0	3	4	1	0	0	7	7
2024-03-04	1	1	1	26	0	3	4	1	0	0	7	7
2024-03-04	1	1	2	37	0	3	4	1	0	0	7	7
2024-03-04	1	1	3	39	0	3	4	1	0	0	7	7
2024-03-04	1	1	4	23	0	3	4	1	0	0	7	7
2024-03-04	1	1	5	63	0	3	4	1	0	0	7	7
2024-03-04	1	1	6	135	0	3	4	1	0	0	7	7
2024-03-04	1	1	7	239	0	3	4	1	0	0	7	7
2024-03-04	1	1	8	180	0	3	4	1	0	0	7	7
2024-03-04	1	1	9	130	0	3	4	1	0	0	7	7
2024-03-04	1	1	10	240	0	3	4	1	0	0	7	7
2024-03-04	1	1	11	293	0	3	4	1	0	0	7	7
2024-03-04	1	1	12	254	0	3	4	1	0	0	7	7
2024-03-04	1	1	13	130	0	3	4	1	0	0	7	7
2024-03-04	1	1	14	289	0	3	4	1	0	0	7	7
2024-03-04	1	1	15	206	0	3	4	1	0	0	7	7
2024-03-04	1	1	16	103	0	3	4	1	0	0	7	7
2024-03-04	1	1	17	598	0	3	4	1	0	0	7	7
2024-03-04	1	1	18	468	0	3	4	1	0	0	7	7
2024-03-04	1	1	19	71	0	3	4	1	0	0	7	7
2024-03-04	1	1	20	125	0	3	4	1	0	0	7	7
2024-03-04	1	1	21	81	0	3	4	1	0	0	7	7
2024-03-04	1	1	22	112	0	3	4	1	0	0	7	7
2024-03-04	1	1	23	282	0	3	4	1	0	0	7	7
2024-03-04	1	1	0	45	1	4	1	1	0	0	10	14
2024-03-04	1	1	1	87	1	4	1	1	0	0	10	14
2024-03-04	1	1	2	84	1	4	1	1	0	0	10	14
2024-03-04	1	1	3	16	1	4	1	1	0	0	10	14
2024-03-04	1	1	4	53	1	4	1	1	0	0	10	14
2024-03-04	1	1	5	75	1	4	1	1	0	0	10	14
2024-03-04	1	1	6	129	1	4	1	1	0	0	10	14
2024-03-04	1	1	7	765	1	4	1	1	0	0	10	14
2024-03-04	1	1	8	363	1	4	1	1	0	0	10	14
2024-03-04	1	1	9	159	1	4	1	1	0	0	10	14
2024-03-04	1	1	10	159	1	4	1	1	0	0	10	14
2024-03-04	1	1	11	289	1	4	1	1	0	0	10	14
2024-03-04	1	1	12	159	1	4	1	1	0	0	10	14
2024-03-04	1	1	13	117	1	4	1	1	0	0	10	14
2024-03-04	1	1	14	352	1	4	1	1	0	0	10	14
2024-03-04	1	1	15	123	1	4	1	1	0	0	10	14
2024-03-04	1	1	16	252	1	4	1	1	0	0	10	14
2024-03-04	1	1	17	162	1	4	1	1	0	0	10	14
2024-03-04	1	1	18	321	1	4	1	1	0	0	10	14
2024-03-04	1	1	19	99	1	4	1	1	0	0	10	14
2024-03-04	1	1	20	198	1	4	1	1	0	0	10	14
2024-03-04	1	1	21	187	1	4	1	1	0	0	10	14
2024-03-04	1	1	22	117	1	4	1	1	0	0	10	14
2024-03-04	1	1	23	367	1	4	1	1	0	0	10	14
2024-03-05	2	1	0	16	1	4	1	1	0	0	10	10
2024-03-05	2	1	1	19	1	4	1	1	0	0	10	10
2024-03-05	2	1	2	23	1	4	1	1	0	0	10	10
2024-03-05	2	1	3	34	1	4	1	1	0	0	10	10
2024-03-05	2	1	4	39	1	4	1	1	0	0	10	10
2024-03-05	2	1	5	61	1	4	1	1	0	0	10	10
2024-03-05	2	1	6	165	1	4	1	1	0	0	10	10
2024-03-05	2	1	7	240	1	4	1	1	0	0	10	10
2024-03-05	2	1	8	633	1	4	1	1	0	0	10	10
2024-03-05	2	1	9	284	1	4	1	1	0	0	10	10
2024-03-05	2	1	10	296	1	4	1	1	0	0	10	10
2024-03-05	2	1	11	140	1	4	1	1	0	0	10	10
2024-03-05	2	1	12	182	1	4	1	1	0	0	10	10
2024-03-05	2	1	13	264	1	4	1	1	0	0	10	10
2024-03-05	2	1	14	159	1	4	1	1	0	0	10	10
2024-03-05	2	1	15	272	1	4	1	1	0	0	10	10
2024-03-05	2	1	16	291	1	4	1	1	0	0	10	10
2024-03-05	2	1	17	463	1	4	1	1	0	0	10	10
2024-03-05	2	1	18	429	1	4	1	1	0	0	10	10
2024-03-05	2	1	19	260	1	4	1	1	0	0	10	10
2024-03-05	2	1	20	154	1	4	1	1	0	0	10	10
2024-03-05	2	1	21	92	1	4	1	1	0	0	10	10
2024-03-05	2	1	22	180	1	4	1	1	0	0	10	10
2024-03-05	2	1	23	78	1	4	1	1	0	0	10	10
2024-03-05	2	1	0	20	0	3	4	1	0	0	7	7
2024-03-05	2	1	1	22	0	3	4	1	0	0	7	7
2024-03-05	2	1	2	19	0	3	4	1	0	0	7	7
2024-03-05	2	1	3	51	0	3	4	1	0	0	7	7
2024-03-05	2	1	4	24	0	3	4	1	0	0	7	7
2024-03-05	2	1	5	13	0	3	4	1	0	0	7	7
2024-03-05	2	1	6	231	0	3	4	1	0	0	7	7
2024-03-05	2	1	7	596	0	3	4	1	0	0	7	7
2024-03-05	2	1	8	618	0	3	4	1	0	0	7	7
2024-03-05	2	1	9	77	0	3	4	1	0	0	7	7
2024-03-05	2	1	10	55	0	3	4	1	0	0	7	7
2024-03-05	2	1	11	280	0	3	4	1	0	0	7	7
2024-03-05	2	1	12	192	0	3	4	1	0	0	7	7
2024-03-05	2	1	13	286	0	3	4	1	0	0	7	7
2024-03-05	2	1	14	275	0	3	4	1	0	0	7	7
2024-03-05	2	1	15	251	0	3	4	1	0	0	7	7
2024-03-05	2	1	16	148	0	3	4	1	0	0	7	7
2024-03-05	2	1	17	288	0	3	4	1	0	0	7	7
2024-03-05	2	1	18	574	0	3	4	1	0	0	7	7
2024-03-05	2	1	19	233	0	3	4	1	0	0	7	7
2024-03-05	2	1	20	130	0	3	4	1	0	0	7	7
2024-03-05	2	1	21	181	0	3	4	1	0	0	7	7
2024-03-05	2	1	22	168	0	3	4	1	0	0	7	7
2024-03-05	2	1	23	291	0	3	4	1	0	0	7	7
2024-03-05	2	1	0	36	1	4	1	1	0	0	10	14
2024-03-05	2	1	1	79	1	4	1	1	0	0	10	14
2024-03-05	2	1	2	71	1	4	1	1	0	0	10	14
2024-03-05	2	1	3	67	1	4	1	1	0	0	10	14
2024-03-05	2	1	4	38	1	4	1	1	0	0	10	14
2024-03-05	2	1	5	15	1	4	1	1	0	0	10	14
2024-03-05	2	1	6	445	1	4	1	1	0	0	10	14
2024-03-05	2	1	7	354	1	4	1	1	0	0	10	14
2024-03-05	2	1	8	576	1	4	1	1	0	0	10	14
2024-03-05	2	1	9	79	1	4	1	1	0	0	10	14
2024-03-05	2	1	10	252	1	4	1	1	0	0	10	14
2024-03-05	2	1	11	336	1	4	1	1	0	0	10	14
2024-03-05	2	1	12	439	1	4	1	1	0	0	10	14
2024-03-05	2	1	13	246	1	4	1	1	0	0	10	14
2024-03-05	2	1	14	192	1	4	1	1	0	0	10	14
2024-03-05	2	1	15	334	1	4	1	1	0	0	10	14
2024-03-05	2	1	16	372	1	4	1	1	0	0	10	14
2024-03-05	2	1	17	831	1	4	1	1	0	0	10	14
2024-03-05	2	1	18	801	1	4	1	1	0	0	10	14
2024-03-05	2	1	19	255	1	4	1	1	0	0	10	14
2024-03-05	2	1	20	153	1	4	1	1	0	0	10	14
2024-03-05	2	1	21	144	1	4	1	1	0	0	10	14
2024-03-05	2	1	22	118	1	4	1	1	0	0	10	14
2024-03-05	2	1	23	232	1	4	1	1	0	0	10	14
2024-03-06	3	1	0	53	1	4	1	1	0	0	10	10
2024-03-06	3	1	1	48	1	4	1	1	0	0	10	10
2024-03-06	3	1	2	32	1	4	1	1	0	0	10	10
2024-03-06	3	1	3	33	1	4	1	1	0	0	10	10
2024-03-06	3	1	4	26	1	4	1	1	0	0	10	10
2024-03-06	3	1	5	36	1	4	1	1	0	0	10	10
2024-03-06	3	1	6	294	1	4	1	1	0	0	10	10
2024-03-06	3	1	7	602	1	4	1	1	0	0	10	10
2024-03-06	3	1	8	189	1	4	1	1	0	0	10	10
2024-03-06	3	1	9	208	1	4	1	1	0	0	10	10
2024-03-06	3	1	10	259	1	4	1	1	0	0	10	10
2024-03-06	3	1	11	290	1	4	1	1	0	0	10	10
2024-03-06	3	1	12	141	1	4	1	1	0	0	10	10
2024-03-06	3	1	13	187	1	4	1	1	0	0	10	10
2024-03-06	3	1	14	350	1	4	1	1	0	0	10	10
2024-03-06	3	1	15	234	1	4	1	1	0	0	10	10
2024-03-06	3	1	16	112	1	4	1	1	0	0	10	10
2024-03-06	3	1	17	144	1	4	1	1	0	0	10	10
2024-03-06	3	1	18	175	1	4	1	1	0	0	10	10
2024-03-06	3	1	19	124	1	4	1	1	0	0	10	10
2024-03-06	3	1	20	130	1	4	1	1	0	0	10	10
2024-03-06	3	1	21	199	1	4	1	1	0	0	10	10
2024-03-06	3	1	22	194	1	4	1	1	0	0	10	10
2024-03-06	3	1	23	188	1	4	1	1	0	0	10	10
2024-03-06	3	1	0	53	0	3	4	1	0	0	7	7
2024-03-06	3	1	1	46	0	3	4	1	0	0	7	7
2024-03-06	3	1	2	24	0	3	4	1	0	0	7	7
2024-03-06	3	1	3	11	0	3	4	1	0	0	7	7
2024-03-06	3	1	4	63	0	3	4	1	0	0	7	7
2024-03-06	3	1	5	29	0	3	4	1	0	0	7	7
2024-03-06	3	1	6	151	0	3	4	1	0	0	7	7
2024-03-06	3	1	7	528	0	3	4	1	0	0	7	7
2024-03-06	3	1	8	385	0	3	4	1	0	0	7	7
2024-03-06	3	1	9	250	0	3	4	1	0	0	7	7
2024-03-06	3	1	10	244	0	3	4	1	0	0	7	7
2024-03-06	3	1	11	320	0	3	4	1	0	0	7	7
2024-03-06	3	1	12	185	0	3	4	1	0	0	7	7
2024-03-06	3	1	13	293	0	3	4	1	0	0	7	7
2024-03-06	3	1	14	254	0	3	4	1	0	0	7	7
2024-03-06	3	1	15	286	0	3	4	1	0	0	7	7
2024-03-06	3	1	16	247	0	3	4	1	0	0	7	7
2024-03-06	3	1	17	481	0	3	4	1	0	0	7	7
2024-03-06	3	1	18	521	0	3	4	1	0	0	7	7
2024-03-06	3	1	19	81	0	3	4	1	0	0	7	7
2024-03-06	3	1	20	308	0	3	4	1	0	0	7	7
2024-03-06	3	1	21	279	0	3	4	1	0	0	7	7
2024-03-06	3	1	22	234	0	3	4	1	0	0	7	7
2024-03-06	3	1	23	108	0	3	4	1	0	0	7	7
2024-03-06	3	1	0	73	1	4	1	1	0	0	10	14
2024-03-06	3	1	1	37	1	4	1	1	0	0	10	14
2024-03-06	3	1	2	27	1	4	1	1	0	0	10	14
2024-03-06	3	1	3	48	1	4	1	1	0	0	10	14
2024-03-06	3	1	4	62	1	4	1	1	0	0	10	14
2024-03-06	3	1	5	90	1	4	1	1	0	0	10	14
2024-03-06	3	1	6	207	1	4	1	1	0	0	10	14
2024-03-06	3	1	7	174	1	4	1	1	0	0	10	14
2024-03-06	3	1	8	312	1	4	1	1	0	0	10	14
2024-03-06	3	1	9	313	1	4	1	1	0	0	10	14
2024-03-06	3	1	10	211	1	4	1	1	0	0	10	14
2024-03-06	3	1	11	375	1	4	1	1	0	0	10	14
2024-03-06	3	1	12	232	1	4	1	1	0	0	10	14
2024-03-06	3	1	13	351	1	4	1	1	0	0	10	14
2024-03-06	3	1	14	381	1	4	1	1	0	0	10	14
2024-03-06	3	1	15	319	1	4	1	1	0	0	10	14
2024-03-06	3	1	16	223	1	4	1	1	0	0	10	14
2024-03-06	3	1	17	573	1	4	1	1	0	0	10	14
2024-03-06	3	1	18	441	1	4	1	1	0	0	10	14
2024-03-06	3	1	19	196	1	4	1	1	0	0	10	14
2024-03-06	3	1	20	105	1	4	1	1	0	0	10	14
2024-03-06	3	1	21	246	1	4	1	1	0	0	10	14
2024-03-06	3	1	22	315	1	4	1	1	0	0	10	14
2024-03-06	3	1	23	259	1	4	1	1	0	0	10	14
2024-03-07	4	1	0	61	1	4	1	1	0	0	10	10
2024-03-07	4	1	1	26	1	4	1	1	0	0	10	10
2024-03-07	4	1	2	40	1	4	1	1	0	0	10	10
2024-03-07	4	1	3	51	1	4	1	1	0	0	10	10
2024-03-07	4	1	4	31	1	4	1	1	0	0	10	10
2024-03-07	4	1	5	20	1	4	1	1	0	0	10	10
2024-03-07	4	1	6	290	1	4	1	1	0	0	10	10
2024-03-07	4	1	7	506	1	4	1	1	0	0	10	10
2024-03-07	4	1	8	254	1	4	1	1	0	0	10	10
2024-03-07	4	1	9	96	1	4	1	1	0	0	10	10
2024-03-07	4	1	10	255	1	4	1	1	0	0	10	10
2024-03-07	4	1	11	259	1	4	1	1	0	0	10	10
2024-03-07	4	1	12	267	1	4	1	1	0	0	10	10
2024-03-07	4	1	13	156	1	4	1	1	0	0	10	10
2024-03-07	4	1	14	358	1	4	1	1	0	0	10	10
2024-03-07	4	1	15	81	1	4	1	1	0	0	10	10
2024-03-07	4	1	16	220	1	4	1	1	0	0	10	10
2024-03-07	4	1	17	715	1	4	1	1	0	0	10	10
2024-03-07	4	1	18	160	1	4	1	1	0	0	10	10
2024-03-07	4	1	19	151	1	4	1	1	0	0	10	10
2024-03-07	4	1	20	123	1	4	1	1	0	0	10	10
2024-03-07	4	1	21	199	1	4	1	1	0	0	10	10
2024-03-07	4	1	22	339	1	4	1	1	0	0	10	10
2024-03-07	4	1	23	296	1	4	1	1	0	0	10	10
2024-03-07	4	1	0	24	0	3	4	1	0	0	7	7
2024-03-07	4	1	1	39	0	3	4	1	0	0	7	7
2024-03-07	4	1	2	14	0	3	4	1	0	0	7	7
2024-03-07	4	1	3	45	0	3	4	1	0	0	7	7
2024-03-07	4	1	4	34	0	3	4	1	0	0	7	7
2024-03-07	4	1	5	52	0	3	4	1	0	0	7	7
2024-03-07	4	1	6	122	0	3	4	1	0	0	7	7
2024-03-07	4	1	7	376	0	3	4	1	0	0	7	7
2024-03-07	4	1	8	259	0	3	4	1	0	0	7	7
2024-03-07	4	1	9	73	0	3	4	1	0	0	7	7
2024-03-07	4	1	10	290	0	3	4	1	0	0	7	7
2024-03-07	4	1	11	126	0	3	4	1	0	0	7	7
2024-03-07	4	1	12	172	0	3	4	1	0	0	7	7
2024-03-07	4	1	13	247	0	3	4	1	0	0	7	7
2024-03-07	4	1	14	320	0	3	4	1	0	0	7	7
2024-03-07	4	1	15	92	0	3	4	1	0	0	7	7
2024-03-07	4	1	16	327	0	3	4	1	0	0	7	7
2024-03-07	4	1	17	270	0	3	4	1	0	0	7	7
2024-03-07	4	1	18	187	0	3	4	1	0	0	7	7
2024-03-07	4	1	19	182	0	3	4	1	0	0	7	7
2024-03-07	4	1	20	276	0	3	4	1	0	0	7	7
2024-03-07	4	1	21	55	0	3	4	1	0	0	7	7
2024-03-07	4	1	22	317	0	3	4	1	0	0	7	7
2024-03-07	4	1	23	196	0	3	4	1	0	0	7	7
2024-03-07	4	1	0	51	1	4	1	1	0	0	10	14
2024-03-07	4	1	1	52	1	4	1	1	0	0	10	14
2024-03-07	4	1	2	21	1	4	1	1	0	0	10	14
2024-03-07	4	1	3	47	1	4	1	1	0	0	10	14
2024-03-07	4	1	4	59	1	4	1	1	0	0	10	14
2024-03-07	4	1	5	15	1	4	1	1	0	0	10	14
2024-03-07	4	1	6	219	1	4	1	1	0	0	10	14
2024-03-07	4	1	7	879	1	4	1	1	0	0	10	14
2024-03-07	4	1	8	675	1	4	1	1	0	0	10	14
2024-03-07	4	1	9	198	1	4	1	1	0	0	10	14
2024-03-07	4	1	10	447	1	4	1	1	0	0	10	14
2024-03-07	4	1	11	243	1	4	1	1	0	0	10	14
2024-03-07	4	1	12	103	1	4	1	1	0	0	10	14
2024-03-07	4	1	13	252	1	4	1	1	0	0	10	14
2024-03-07	4	1	14	442	1	4	1	1	0	0	10	14
2024-03-07	4	1	15	174	1	4	1	1	0	0	10	14
2024-03-07	4	1	16	382	1	4	1	1	0	0	10	14
2024-03-07	4	1	17	456	1	4	1	1	0	0	10	14
2024-03-07	4	1	18	648	1	4	1	1	0	0	10	14
2024-03-07	4	1	19	208	1	4	1	1	0	0	10	14
2024-03-07	4	1	20	79	1	4	1	1	0	0	10	14
2024-03-07	4	1	21	223	1	4	1	1	0	0	10	14
2024-03-07	4	1	22	217	1	4	1	1	0	0	10	14
2024-03-07	4	1	23	93	1	4	1	1	0	0	10	14
2024-03-08	5	1	0	41	1	4	1	1	0	0	10	10
2024-03-08	5	1	1	18	1	4	1	1	0	0	10	10
2024-03-08	5	1	2	37	1	4	1	1	0	0	10	10
2024-03-08	5	1	3	53	1	4	1	1	0	0	10	10
2024-03-08	5	1	4	12	1	4	1	1	0	0	10	10
2024-03-08	5	1	5	70	1	4	1	1	0	0	10	10
2024-03-08	5	1	6	313	1	4	1	1	0	0	10	10
2024-03-08	5	1	7	540	1	4	1	1	0	0	10	10
2024-03-08	5	1	8	175	1	4	1	1	0	0	10	10
2024-03-08	5	1	9	136	1	4	1	1	0	0	10	10
2024-03-08	5	1	10	177	1	4	1	1	0	0	10	10
2024-03-08	5	1	11	219	1	4	1	1	0	0	10	10
2024-03-08	5	1	12	284	1	4	1	1	0	0	10	10
2024-03-08	5	1	13	104	1	4	1	1	0	0	10	10
2024-03-08	5	1	14	126	1	4	1	1	0	0	10	10
2024-03-08	5	1	15	217	1	4	1	1	0	0	10	10
2024-03-08	5	1	16	129	1	4	1	1	0	0	10	10
2024-03-08	5	1	17	218	1	4	1	1	0	0	10	10
2024-03-08	5	1	18	261	1	4	1	1	0	0	10	10
2024-03-08	5	1	19	80	1	4	1	1	0	0	10	10
2024-03-08	5	1	20	295	1	4	1	1	0	0	10	10
2024-03-08	5	1	21	256	1	4	1	1	0	0	10	10
2024-03-08	5	1	22	70	1	4	1	1	0	0	10	10
2024-03-08	5	1	23	232	1	4	1	1	0	0	10	10
2024-03-08	5	1	0	57	0	3	4	1	0	0	7	7
2024-03-08	5	1	1	24	0	3	4	1	0	0	7	7
2024-03-08	5	1	2	31	0	3	4	1	0	0	7	7
2024-03-08	5	1	3	51	0	3	4	1	0	0	7	7
2024-03-08	5	1	4	39	0	3	4	1	0	0	7	7
2024-03-08	5	1	5	46	0	3	4	1	0	0	7	7
2024-03-08	5	1	6	138	0	3	4	1	0	0	7	7
2024-03-08	5	1	7	453	0	3	4	1	0	0	7	7
2024-03-08	5	1	8	378	0	3	4	1	0	0	7	7
2024-03-08	5	1	9	207	0	3	4	1	0	0	7	7
2024-03-08	5	1	10	304	0	3	4	1	0	0	7	7
2024-03-08	5	1	11	223	0	3	4	1	0	0	7	7
2024-03-08	5	1	12	163	0	3	4	1	0	0	7	7
2024-03-08	5	1	13	176	0	3	4	1	0	0	7	7
2024-03-08	5	1	14	169	0	3	4	1	0	0	7	7
2024-03-08	5	1	15	278	0	3	4	1	0	0	7	7
2024-03-08	5	1	16	103	0	3	4	1	0	0	7	7
2024-03-08	5	1	17	594	0	3	4	1	0	0	7	7
2024-03-08	5	1	18	354	0	3	4	1	0	0	7	7
2024-03-08	5	1	19	213	0	3	4	1	0	0	7	7
2024-03-08	5	1	20	306	0	3	4	1	0	0	7	7
2024-03-08	5	1	21	283	0	3	4	1	0	0	7	7
2024-03-08	5	1	22	237	0	3	4	1	0	0	7	7
2024-03-08	5	1	23	231	0	3	4	1	0	0	7	7
2024-03-08	5	1	0	71	1	4	1	1	0	0	10	14
2024-03-08	5	1	1	29	1	4	1	1	0	0	10	14
2024-03-08	5	1	2	86	1	4	1	1	0	0	10	14
2024-03-08	5	1	3	21	1	4	1	1	0	0	10	14
2024-03-08	5	1	4	24	1	4	1	1	0	0	10	14
2024-03-08	5	1	5	18	1	4	1	1	0	0	10	14
2024-03-08	5	1	6	367	1	4	1	1	0	0	10	14
2024-03-08	5	1	7	723	1	4	1	1	0	0	10	14
2024-03-08	5	1	8	468	1	4	1	1	0	0	10	14
2024-03-08	5	1	9	222	1	4	1	1	0	0	10	14
2024-03-08	5	1	10	439	1	4	1	1	0	0	10	14
2024-03-08	5	1	11	258	1	4	1	1	0	0	10	14
2024-03-08	5	1	12	145	1	4	1	1	0	0	10	14
2024-03-08	5	1	13	124	1	4	1	1	0	0	10	14
2024-03-08	5	1	14	249	1	4	1	1	0	0	10	14
2024-03-08	5	1	15	420	1	4	1	1	0	0	10	14
2024-03-08	5	1	16	421	1	4	1	1	0	0	10	14
2024-03-08	5	1	17	351	1	4	1	1	0	0	10	14
2024-03-08	5	1	18	516	1	4	1	1	0	0	10	14
2024-03-08	5	1	19	237	1	4	1	1	0	0	10	14
2024-03-08	5	1	20	193	1	4	1	1	0	0	10	14
2024-03-08	5	1	21	280	1	4	1	1	0	0	10	14
2024-03-08	5	1	22	328	1	4	1	1	0	0	10	14
2024-03-08	5	1	23	388	1	4	1	1	0	0	10	14
2024-03-09	6	0	0	45	1	4	1	1	0	0	10	10
2024-03-09	6	0	1	116	1	4	1	1	0	0	10	10
2024-03-09	6	0	2	66	1	4	1	1	0	0	10	10
2024-03-09	6	0	3	99	1	4	1	1	0	0	10	10
2024-03-09	6	0	4	63	1	4	1	1	0	0	10	10
2024-03-09	6	0	5	80	1	4	1	1	0	0	10	10
2024-03-09	6	0	6	429	1	4	1	1	0	0	10	10
2024-03-09	6	0	7	580	1	4	1	1	0	0	10	10
2024-03-09	6	0	8	412	1	4	1	1	0	0	10	10
2024-03-09	6	0	9	324	1	4	1	1	0	0	10	10
2024-03-09	6	0	10	552	1	4	1	1	0	0	10	10
2024-03-09	6	0	11	349	1	4	1	1	0	0	10	10
2024-03-09	6	0	12	244	1	4	1	1	0	0	10	10
2024-03-09	6	0	13	169	1	4	1	1	0	0	10	10
2024-03-09	6	0	14	225	1	4	1	1	0	0	10	10
2024-03-09	6	0	15	201	1	4	1	1	0	0	10	10
2024-03-09	6	0	16	320	1	4	1	1	0	0	10	10
2024-03-09	6	0	17	892	1	4	1	1	0	0	10	10
2024-03-09	6	0	18	1180	1	4	1	1	0	0	10	10
2024-03-09	6	0	19	318	1	4	1	1	0	0	10	10
2024-03-09	6	0	20	415	1	4	1	1	0	0	10	10
2024-03-09	6	0	21	398	1	4	1	1	0	0	10	10
2024-03-09	6	0	22	136	1	4	1	1	0	0	10	10
2024-03-09	6	0	23	193	1	4	1	1	0	0	10	10
2024-03-09	6	0	0	34	0	3	4	1	0	0	7	7
2024-03-09	6	0	1	81	0	3	4	1	0	0	7	7
2024-03-09	6	0	2	97	0	3	4	1	0	0	7	7
2024-03-09	6	0	3	104	0	3	4	1	0	0	7	7
2024-03-09	6	0	4	22	0	3	4	1	0	0	7	7
2024-03-09	6	0	5	82	0	3	4	1	0	0	7	7
2024-03-09	6	0	6	430	0	3	4	1	0	0	7	7
2024-03-09	6	0	7	334	0	3	4	1	0	0	7	7
2024-03-09	6	0	8	547	0	3	4	1	0	0	7	7
2024-03-09	6	0	9	422	0	3	4	1	0	0	7	7
2024-03-09	6	0	10	221	0	3	4	1	0	0	7	7
2024-03-09	6	0	11	504	0	3	4	1	0	0	7	7
2024-03-09	6	0	12	298	0	3	4	1	0	0	7	7
2024-03-09	6	0	13	543	0	3	4	1	0	0	7	7
2024-03-09	6	0	14	294	0	3	4	1	0	0	7	7
2024-03-09	6	0	15	147	0	3	4	1	0	0	7	7
2024-03-09	6	0	16	326	0	3	4	1	0	0	7	7
2024-03-09	6	0	17	983	0	3	4	1	0	0	7	7
2024-03-09	6	0	18	693	0	3	4	1	0	0	7	7
2024-03-09	6	0	19	504	0	3	4	1	0	0	7	7
2024-03-09	6	0	20	168	0	3	4	1	0	0	7	7
2024-03-09	6	0	21	515	0	3	4	1	0	0	7	7
2024-03-09	6	0	22	433	0	3	4	1	0	0	7	7
2024-03-09	6	0	23	485	0	3	4	1	0	0	7	7
2024-03-09	6	0	0	73	1	4	1	1	0	0	10	14
2024-03-09	6	0	1	115	1	4	1	1	0	0	10	14
2024-03-09	6	0	2	90	1	4	1	1	0	0	10	14
2024-03-09	6	0	3	109	1	4	1	1	0	0	10	14
2024-03-09	6	0	4	136	1	4	1	1	0	0	10	14
2024-03-09	6	0	5	141	1	4	1	1	0	0	10	14
2024-03-09	6	0	6	498	1	4	1	1	0	0	10	14
2024-03-09	6	0	7	936	1	4	1	1	0	0	10	14
2024-03-09	6	0	8	444	1	4	1	1	0	0	10	14
2024-03-09	6	0	9	693	1	4	1	1	0	0	10	14
2024-03-09	6	0	10	270	1	4	1	1	0	0	10	14
2024-03-09	6	0	11	553	1	4	1	1	0	0	10	14
2024-03-09	6	0	12	210	1	4	1	1	0	0	10	14
2024-03-09	6	0	13	541	1	4	1	1	0	0	10	14
2024-03-09	6	0	14	724	1	4	1	1	0	0	10	14
2024-03-09	6	0	15	414	1	4	1	1	0	0	10	14
2024-03-09	6	0	16	559	1	4	1	1	0	0	10	14
2024-03-09	6	0	17	828	1	4	1	1	0	0	10	14
2024-03-09	6	0	18	1356	1	4	1	1	0	0	10	14
2024-03-09	6	0	19	253	1	4	1	1	0	0	10	14
2024-03-09	6	0	20	421	1	4	1	1	0	0	10	14
2024-03-09	6	0	21	463	1	4	1	1	0	0	10	14
2024-03-09	6	0	22	576	1	4	1	1	0	0	10	14
2024-03-09	6	0	23	570	1	4	1	1	0	0	10	14
2024-03-10	7	0	0	67	1	4	1	1	0	0	10	10
2024-03-10	7	0	1	87	1	4	1	1	0	0	10	10
2024-03-10	7	0	2	28	1	4	1	1	0	0	10	10
2024-03-10	7	0	3	110	1	4	1	1	0	0	10	10
2024-03-10	7	0	4	35	1	4	1	1	0	0	10	10
2024-03-10	7	0	5	44	1	4	1	1	0	0	10	10
2024-03-10	7	0	6	254	1	4	1	1	0	0	10	10
2024-03-10	7	0	7	1116	1	4	1	1	0	0	10	10
2024-03-10	7	0	8	883	1	4	1	1	0	0	10	10
2024-03-10	7	0	9	187	1	4	1	1	0	0	10	10
2024-03-10	7	0	10	402	1	4	1	1	0	0	10	10
2024-03-10	7	0	11	495	1	4	1	1	0	0	10	10
2024-03-10	7	0	12	432	1	4	1	1	0	0	10	10
2024-03-10	7	0	13	531	1	4	1	1	0	0	10	10
2024-03-10	7	0	14	477	1	4	1	1	0	0	10	10
2024-03-10	7	0	15	334	1	4	1	1	0	0	10	10
2024-03-10	7	0	16	600	1	4	1	1	0	0	10	10
2024-03-10	7	0	17	528	1	4	1	1	0	0	10	10
2024-03-10	7	0	18	1046	1	4	1	1	0	0	10	10
2024-03-10	7	0	19	486	1	4	1	1	0	0	10	10
2024-03-10	7	0	20	451	1	4	1	1	0	0	10	10
2024-03-10	7	0	21	325	1	4	1	1	0	0	10	10
2024-03-10	7	0	22	135	1	4	1	1	0	0	10	10
2024-03-10	7	0	23	382	1	4	1	1	0	0	10	10
2024-03-10	7	0	0	32	0	3	4	1	0	0	7	7
2024-03-10	7	0	1	38	0	3	4	1	0	0	7	7
2024-03-10	7	0	2	54	0	3	4	1	0	0	7	7
2024-03-10	7	0	3	80	0	3	4	1	0	0	7	7
2024-03-10	7	0	4	84	0	3	4	1	0	0	7	7
2024-03-10	7	0	5	66	0	3	4	1	0	0	7	7
2024-03-10	7	0	6	490	0	3	4	1	0	0	7	7
2024-03-10	7	0	7	820	0	3	4	1	0	0	7	7
2024-03-10	7	0	8	1064	0	3	4	1	0	0	7	7
2024-03-10	7	0	9	183	0	3	4	1	0	0	7	7
2024-03-10	7	0	10	280	0	3	4	1	0	0	7	7
2024-03-10	7	0	11	255	0	3	4	1	0	0	7	7
2024-03-10	7	0	12	204	0	3	4	1	0	0	7	7
2024-03-10	7	0	13	190	0	3	4	1	0	0	7	7
2024-03-10	7	0	14	248	0	3	4	1	0	0	7	7
2024-03-10	7	0	15	214	0	3	4	1	0	0	7	7
2024-03-10	7	0	16	191	0	3	4	1	0	0	7	7
2024-03-10	7	0	17	1005	0	3	4	1	0	0	7	7
2024-03-10	7	0	18	734	0	3	4	1	0	0	7	7
2024-03-10	7	0	19	490	0	3	4	1	0	0	7	7
2024-03-10	7	0	20	255	0	3	4	1	0	0	7	7
2024-03-10	7	0	21	331	0	3	4	1	0	0	7	7
2024-03-10	7	0	22	512	0	3	4	1	0	0	7	7
2024-03-10	7	0	23	271	0	3	4	1	0	0	7	7
2024-03-10	7	0	0	53	1	4	1	1	0	0	10	14
2024-03-10	7	0	1	147	1	4	1	1	0	0	10	14
2024-03-10	7	0	2	33	1	4	1	1	0	0	10	14
2024-03-10	7	0	3	62	1	4	1	1	0	0	10	14
2024-03-10	7	0	4	80	1	4	1	1	0	0	10	14
2024-03-10	7	0	5	31	1	4	1	1	0	0	10	14
2024-03-10	7	0	6	426	1	4	1	1	0	0	10	14
2024-03-10	7	0	7	1239	1	4	1	1	0	0	10	14
2024-03-10	7	0	8	930	1	4	1	1	0	0	10	14
2024-03-10	7	0	9	495	1	4	1	1	0	0	10	14
2024-03-10	7	0	10	379	1	4	1	1	0	0	10	14
2024-03-10	7	0	11	165	1	4	1	1	0	0	10	14
2024-03-10	7	0	12	708	1	4	1	1	0	0	10	14
2024-03-10	7	0	13	528	1	4	1	1	0	0	10	14
2024-03-10	7	0	14	274	1	4	1	1	0	0	10	14
2024-03-10	7	0	15	673	1	4	1	1	0	0	10	14
2024-03-10	7	0	16	427	1	4	1	1	0	0	10	14
2024-03-10	7	0	17	1074	1	4	1	1	0	0	10	14
2024-03-10	7	0	18	945	1	4	1	1	0	0	10	14
2024-03-10	7	0	19	280	1	4	1	1	0	0	10	14
2024-03-10	7	0	20	325	1	4	1	1	0	0	10	14
2024-03-10	7	0	21	706	1	4	1	1	0	0	10	14
2024-03-10	7	0	22	372	1	4	1	1	0	0	10	14
2024-03-10	7	0	23	177	1	4	1	1	0	0	10	14
2024-03-11	1	1	0	25	1	4	1	1	0	0	10	10
2024-03-11	1	1	1	20	1	4	1	1	0	0	10	10
2024-03-11	1	1	2	32	1	4	1	1	0	0	10	10
2024-03-11	1	1	3	28	1	4	1	1	0	0	10	10
2024-03-11	1	1	4	37	1	4	1	1	0	0	10	10
2024-03-11	1	1	5	37	1	4	1	1	0	0	10	10
2024-03-11	1	1	6	87	1	4	1	1	0	0	10	10
2024-03-11	1	1	7	158	1	4	1	1	0	0	10	10
2024-03-11	1	1	8	662	1	4	1	1	0	0	10	10
2024-03-11	1	1	9	153	1	4	1	1	0	0	10	10
2024-03-11	1	1	10	67	1	4	1	1	0	0	10	10
2024-03-11	1	1	11	330	1	4	1	1	0	0	10	10
2024-03-11	1	1	12	250	1	4	1	1	0	0	10	10
2024-03-11	1	1	13	156	1	4	1	1	0	0	10	10
2024-03-11	1	1	14	248	1	4	1	1	0	0	10	10
2024-03-11	1	1	15	124	1	4	1	1	0	0	10	10
2024-03-11	1	1	16	298	1	4	1	1	0	0	10	10
2024-03-11	1	1	17	568	1	4	1	1	0	0	10	10
2024-03-11	1	1	18	249	1	4	1	1	0	0	10	10
2024-03-11	1	1	19	354	1	4	1	1	0	0	10	10
2024-03-11	1	1	20	150	1	4	1	1	0	0	10	10
2024-03-11	1	1	21	141	1	4	1	1	0	0	10	10
2024-03-11	1	1	22	180	1	4	1	1	0	0	10	10
2024-03-11	1	1	23	150	1	4	1	1	0	0	10	10
2024-03-11	1	1	0	45	0	3	4	1	0	0	7	7
2024-03-11	1	1	1	43	0	3	4	1	0	0	7	7
2024-03-11	1	1	2	25	0	3	4	1	0	0	7	7
2024-03-11	1	1	3	32	0	3	4	1	0	0	7	7
2024-03-11	1	1	4	33	0	3	4	1	0	0	7	7
2024-03-11	1	1	5	16	0	3	4	1	0	0	7	7
2024-03-11	1	1	6	273	0	3	4	1	0	0	7	7
2024-03-11	1	1	7	222	0	3	4	1	0	0	7	7
2024-03-11	1	1	8	558	0	3	4	1	0	0	7	7
2024-03-11	1	1	9	299	0	3	4	1	0	0	7	7
2024-03-11	1	1	10	61	0	3	4	1	0	0	7	7
2024-03-11	1	1	11	154	0	3	4	1	0	0	7	7
2024-03-11	1	1	12	268	0	3	4	1	0	0	7	7
2024-03-11	1	1	13	218	0	3	4	1	0	0	7	7
2024-03-11	1	1	14	270	0	3	4	1	0	0	7	7
2024-03-11	1	1	15	170	0	3	4	1	0	0	7	7
2024-03-11	1	1	16	294	0	3	4	1	0	0	7	7
2024-03-11	1	1	17	473	0	3	4	1	0	0	7	7
2024-03-11	1	1	18	534	0	3	4	1	0	0	7	7
2024-03-11	1	1	19	269	0	3	4	1	0	0	7	7
2024-03-11	1	1	20	170	0	3	4	1	0	0	7	7
2024-03-11	1	1	21	326	0	3	4	1	0	0	7	7
2024-03-11	1	1	22	67	0	3	4	1	0	0	7	7
2024-03-11	1	1	23	161	0	3	4	1	0	0	7	7
2024-03-11	1	1	0	15	1	4	1	1	0	0	10	14
2024-03-11	1	1	1	55	1	4	1	1	0	0	10	14
2024-03-11	1	1	2	89	1	4	1	1	0	0	10	14
2024-03-11	1	1	3	78	1	4	1	1	0	0	10	14
2024-03-11	1	1	4	43	1	4	1	1	0	0	10	14
2024-03-11	1	1	5	32	1	4	1	1	0	0	10	14
2024-03-11	1	1	6	103	1	4	1	1	0	0	10	14
2024-03-11	1	1	7	609	1	4	1	1	0	0	10	14
2024-03-11	1	1	8	261	1	4	1	1	0	0	10	14
2024-03-11	1	1	9	399	1	4	1	1	0	0	10	14
2024-03-11	1	1	10	423	1	4	1	1	0	0	10	14
2024-03-11	1	1	11	237	1	4	1	1	0	0	10	14
2024-03-11	1	1	12	174	1	4	1	1	0	0	10	14
2024-03-11	1	1	13	352	1	4	1	1	0	0	10	14
2024-03-11	1	1	14	418	1	4	1	1	0	0	10	14
2024-03-11	1	1	15	76	1	4	1	1	0	0	10	14
2024-03-11	1	1	16	318	1	4	1	1	0	0	10	14
2024-03-11	1	1	17	234	1	4	1	1	0	0	10	14
2024-03-11	1	1	18	381	1	4	1	1	0	0	10	14
2024-03-11	1	1	19	259	1	4	1	1	0	0	10	14
2024-03-11	1	1	20	153	1	4	1	1	0	0	10	14
2024-03-11	1	1	21	442	1	4	1	1	0	0	10	14
2024-03-11	1	1	22	423	1	4	1	1	0	0	10	14
2024-03-11	1	1	23	147	1	4	1	1	0	0	10	14
2024-03-12	2	1	0	26	1	4	1	1	0	0	10	10
2024-03-12	2	1	1	39	1	4	1	1	0	0	10	10
2024-03-12	2	1	2	64	1	4	1	1	0	0	10	10
2024-03-12	2	1	3	17	1	4	1	1	0	0	10	10
2024-03-12	2	1	4	28	1	4	1	1	0	0	10	10
2024-03-12	2	1	5	62	1	4	1	1	0	0	10	10
2024-03-12	2	1	6	258	1	4	1	1	0	0	10	10
2024-03-12	2	1	7	456	1	4	1	1	0	0	10	10
2024-03-12	2	1	8	309	1	4	1	1	0	0	10	10
2024-03-12	2	1	9	99	1	4	1	1	0	0	10	10
2024-03-12	2	1	10	94	1	4	1	1	0	0	10	10
2024-03-12	2	1	11	86	1	4	1	1	0	0	10	10
2024-03-12	2	1	12	259	1	4	1	1	0	0	10	10
2024-03-12	2	1	13	85	1	4	1	1	0	0	10	10
2024-03-12	2	1	14	223	1	4	1	1	0	0	10	10
2024-03-12	2	1	15	332	1	4	1	1	0	0	10	10
2024-03-12	2	1	16	277	1	4	1	1	0	0	10	10
2024-03-12	2	1	17	376	1	4	1	1	0	0	10	10
2024-03-12	2	1	18	542	1	4	1	1	0	0	10	10
2024-03-12	2	1	19	328	1	4	1	1	0	0	10	10
2024-03-12	2	1	20	237	1	4	1	1	0	0	10	10
2024-03-12	2	1	21	163	1	4	1	1	0	0	10	10
2024-03-12	2	1	22	301	1	4	1	1	0	0	10	10
2024-03-12	2	1	23	70	1	4	1	1	0	0	10	10
2024-03-12	2	1	0	51	0	3	4	1	0	0	7	7
2024-03-12	2	1	1	29	0	3	4	1	0	0	7	7
2024-03-12	2	1	2	19	0	3	4	1	0	0	7	7
2024-03-12	2	1	3	60	0	3	4	1	0	0	7	7
2024-03-12	2	1	4	30	0	3	4	1	0	0	7	7
2024-03-12	2	1	5	61	0	3	4	1	0	0	7	7
2024-03-12	2	1	6	185	0	3	4	1	0	0	7	7
2024-03-12	2	1	7	308	0	3	4	1	0	0	7	7
2024-03-12	2	1	8	305	0	3	4	1	0	0	7	7
2024-03-12	2	1	9	277	0	3	4	1	0	0	7	7
2024-03-12	2	1	10	269	0	3	4	1	0	0	7	7
2024-03-12	2	1	11	231	0	3	4	1	0	0	7	7
2024-03-12	2	1	12	217	0	3	4	1	0	0	7	7
2024-03-12	2	1	13	166	0	3	4	1	0	0	7	7
2024-03-12	2	1	14	257	0	3	4	1	0	0	7	7
2024-03-12	2	1	15	100	0	3	4	1	0	0	7	7
2024-03-12	2	1	16	121	0	3	4	1	0	0	7	7
2024-03-12	2	1	17	492	0	3	4	1	0	0	7	7
2024-03-12	2	1	18	457	0	3	4	1	0	0	7	7
2024-03-12	2	1	19	293	0	3	4	1	0	0	7	7
2024-03-12	2	1	20	194	0	3	4	1	0	0	7	7
2024-03-12	2	1	21	117	0	3	4	1	0	0	7	7
2024-03-12	2	1	22	293	0	3	4	1	0	0	7	7
2024-03-12	2	1	23	328	0	3	4	1	0	0	7	7
2024-03-12	2	1	0	35	1	4	1	1	0	0	10	14
2024-03-12	2	1	1	64	1	4	1	1	0	0	10	14
2024-03-12	2	1	2	35	1	4	1	1	0	0	10	14
2024-03-12	2	1	3	84	1	4	1	1	0	0	10	14
2024-03-12	2	1	4	49	1	4	1	1	0	0	10	14
2024-03-12	2	1	5	40	1	4	1	1	0	0	10	14
2024-03-12	2	1	6	163	1	4	1	1	0	0	10	14
2024-03-12	2	1	7	294	1	4	1	1	0	0	10	14
2024-03-12	2	1	8	468	1	4	1	1	0	0	10	14
2024-03-12	2	1	9	103	1	4	1	1	0	0	10	14
2024-03-12	2	1	10	282	1	4	1	1	0	0	10	14
2024-03-12	2	1	11	210	1	4	1	1	0	0	10	14
2024-03-12	2	1	12	378	1	4	1	1	0	0	10	14
2024-03-12	2	1	13	321	1	4	1	1	0	0	10	14
2024-03-12	2	1	14	441	1	4	1	1	0	0	10	14
2024-03-12	2	1	15	79	1	4	1	1	0	0	10	14
2024-03-12	2	1	16	286	1	4	1	1	0	0	10	14
2024-03-12	2	1	17	750	1	4	1	1	0	0	10	14
2024-03-12	2	1	18	567	1	4	1	1	0	0	10	14
2024-03-12	2	1	19	309	1	4	1	1	0	0	10	14
2024-03-12	2	1	20	351	1	4	1	1	0	0	10	14
2024-03-12	2	1	21	450	1	4	1	1	0	0	10	14
2024-03-12	2	1	22	369	1	4	1	1	0	0	10	14
2024-03-12	2	1	23	423	1	4	1	1	0	0	10	14
2024-03-13	3	1	0	44	1	4	1	1	0	0	10	10
2024-03-13	3	1	1	17	1	4	1	1	0	0	10	10
2024-03-13	3	1	2	26	1	4	1	1	0	0	10	10
2024-03-13	3	1	3	40	1	4	1	1	0	0	10	10
2024-03-13	3	1	4	49	1	4	1	1	0	0	10	10
2024-03-13	3	1	5	48	1	4	1	1	0	0	10	10
2024-03-13	3	1	6	314	1	4	1	1	0	0	10	10
2024-03-13	3	1	7	424	1	4	1	1	0	0	10	10
2024-03-13	3	1	8	302	1	4	1	1	0	0	10	10
2024-03-13	3	1	9	178	1	4	1	1	0	0	10	10
2024-03-13	3	1	10	271	1	4	1	1	0	0	10	10
2024-03-13	3	1	11	308	1	4	1	1	0	0	10	10
2024-03-13	3	1	12	104	1	4	1	1	0	0	10	10
2024-03-13	3	1	13	225	1	4	1	1	0	0	10	10
2024-03-13	3	1	14	162	1	4	1	1	0	0	10	10
2024-03-13	3	1	15	222	1	4	1	1	0	0	10	10
2024-03-13	3	1	16	128	1	4	1	1	0	0	10	10
2024-03-13	3	1	17	525	1	4	1	1	0	0	10	10
2024-03-13	3	1	18	316	1	4	1	1	0	0	10	10
2024-03-13	3	1	19	172	1	4	1	1	0	0	10	10
2024-03-13	3	1	20	86	1	4	1	1	0	0	10	10
2024-03-13	3	1	21	171	1	4	1	1	0	0	10	10
2024-03-13	3	1	22	63	1	4	1	1	0	0	10	10
2024-03-13	3	1	23	235	1	4	1	1	0	0	10	10
2024-03-13	3	1	0	38	0	3	4	1	0	0	7	7
2024-03-13	3	1	1	58	0	3	4	1	0	0	7	7
2024-03-13	3	1	2	19	0	3	4	1	0	0	7	7
2024-03-13	3	1	3	26	0	3	4	1	0	0	7	7
2024-03-13	3	1	4	22	0	3	4	1	0	0	7	7
2024-03-13	3	1	5	51	0	3	4	1	0	0	7	7
2024-03-13	3	1	6	223	0	3	4	1	0	0	7	7
2024-03-13	3	1	7	125	0	3	4	1	0	0	7	7
2024-03-13	3	1	8	228	0	3	4	1	0	0	7	7
2024-03-13	3	1	9	74	0	3	4	1	0	0	7	7
2024-03-13	3	1	10	244	0	3	4	1	0	0	7	7
2024-03-13	3	1	11	161	0	3	4	1	0	0	7	7
2024-03-13	3	1	12	201	0	3	4	1	0	0	7	7
2024-03-13	3	1	13	321	0	3	4	1	0	0	7	7
2024-03-13	3	1	14	74	0	3	4	1	0	0	7	7
2024-03-13	3	1	15	289	0	3	4	1	0	0	7	7
2024-03-13	3	1	16	284	0	3	4	1	0	0	7	7
2024-03-13	3	1	17	220	0	3	4	1	0	0	7	7
2024-03-13	3	1	18	464	0	3	4	1	0	0	7	7
2024-03-13	3	1	19	321	0	3	4	1	0	0	7	7
2024-03-13	3	1	20	75	0	3	4	1	0	0	7	7
2024-03-13	3	1	21	201	0	3	4	1	0	0	7	7
2024-03-13	3	1	22	294	0	3	4	1	0	0	7	7
2024-03-13	3	1	23	183	0	3	4	1	0	0	7	7
2024-03-13	3	1	0	30	1	4	1	1	0	0	10	14
2024-03-13	3	1	1	82	1	4	1	1	0	0	10	14
2024-03-13	3	1	2	81	1	4	1	1	0	0	10	14
2024-03-13	3	1	3	82	1	4	1	1	0	0	10	14
2024-03-13	3	1	4	24	1	4	1	1	0	0	10	14
2024-03-13	3	1	5	51	1	4	1	1	0	0	10	14
2024-03-13	3	1	6	238	1	4	1	1	0	0	10	14
2024-03-13	3	1	7	435	1	4	1	1	0	0	10	14
2024-03-13	3	1	8	432	1	4	1	1	0	0	10	14
2024-03-13	3	1	9	147	1	4	1	1	0	0	10	14
2024-03-13	3	1	10	414	1	4	1	1	0	0	10	14
2024-03-13	3	1	11	331	1	4	1	1	0	0	10	14
2024-03-13	3	1	12	111	1	4	1	1	0	0	10	14
2024-03-13	3	1	13	313	1	4	1	1	0	0	10	14
2024-03-13	3	1	14	274	1	4	1	1	0	0	10	14
2024-03-13	3	1	15	121	1	4	1	1	0	0	10	14
2024-03-13	3	1	16	417	1	4	1	1	0	0	10	14
2024-03-13	3	1	17	222	1	4	1	1	0	0	10	14
2024-03-13	3	1	18	273	1	4	1	1	0	0	10	14
2024-03-13	3	1	19	316	1	4	1	1	0	0	10	14
2024-03-13	3	1	20	441	1	4	1	1	0	0	10	14
2024-03-13	3	1	21	186	1	4	1	1	0	0	10	14
2024-03-13	3	1	22	270	1	4	1	1	0	0	10	14
2024-03-13	3	1	23	366	1	4	1	1	0	0	10	14
2024-03-14	4	1	0	40	1	4	1	1	0	0	10	10
2024-03-14	4	1	1	66	1	4	1	1	0	0	10	10
2024-03-14	4	1	2	14	1	4	1	1	0	0	10	10
2024-03-14	4	1	3	54	1	4	1	1	0	0	10	10
2024-03-14	4	1	4	29	1	4	1	1	0	0	10	10
2024-03-14	4	1	5	66	1	4	1	1	0	0	10	10
2024-03-14	4	1	6	231	1	4	1	1	0	0	10	10
2024-03-14	4	1	7	175	1	4	1	1	0	0	10	10
2024-03-14	4	1	8	432	1	4	1	1	0	0	10	10
2024-03-14	4	1	9	129	1	4	1	1	0	0	10	10
2024-03-14	4	1	10	124	1	4	1	1	0	0	10	10
2024-03-14	4	1	11	327	1	4	1	1	0	0	10	10
2024-03-14	4	1	12	300	1	4	1	1	0	0	10	10
2024-03-14	4	1	13	319	1	4	1	1	0	0	10	10
2024-03-14	4	1	14	250	1	4	1	1	0	0	10	10
2024-03-14	4	1	15	229	1	4	1	1	0	0	10	10
2024-03-14	4	1	16	242	1	4	1	1	0	0	10	10
2024-03-14	4	1	17	273	1	4	1	1	0	0	10	10
2024-03-14	4	1	18	657	1	4	1	1	0	0	10	10
2024-03-14	4	1	19	109	1	4	1	1	0	0	10	10
2024-03-14	4	1	20	260	1	4	1	1	0	0	10	10
2024-03-14	4	1	21	178	1	4	1	1	0	0	10	10
2024-03-14	4	1	22	165	1	4	1	1	0	0	10	10
2024-03-14	4	1	23	219	1	4	1	1	0	0	10	10
2024-03-14	4	1	0	53	0	3	4	1	0	0	7	7
2024-03-14	4	1	1	20	0	3	4	1	0	0	7	7
2024-03-14	4	1	2	41	0	3	4	1	0	0	7	7
2024-03-14	4	1	3	21	0	3	4	1	0	0	7	7
2024-03-14	4	1	4	20	0	3	4	1	0	0	7	7
2024-03-14	4	1	5	33	0	3	4	1	0	0	7	7
2024-03-14	4	1	6	205	0	3	4	1	0	0	7	7
2024-03-14	4	1	7	508	0	3	4	1	0	0	7	7
2024-03-14	4	1	8	402	0	3	4	1	0	0	7	7
2024-03-14	4	1	9	137	0	3	4	1	0	0	7	7
2024-03-14	4	1	10	187	0	3	4	1	0	0	7	7
2024-03-14	4	1	11	85	0	3	4	1	0	0	7	7
2024-03-14	4	1	12	251	0	3	4	1	0	0	7	7
2024-03-14	4	1	13	194	0	3	4	1	0	0	7	7
2024-03-14	4	1	14	146	0	3	4	1	0	0	7	7
2024-03-14	4	1	15	146	0	3	4	1	0	0	7	7
2024-03-14	4	1	16	134	0	3	4	1	0	0	7	7
2024-03-14	4	1	17	550	0	3	4	1	0	0	7	7
2024-03-14	4	1	18	360	0	3	4	1	0	0	7	7
2024-03-14	4	1	19	133	0	3	4	1	0	0	7	7
2024-03-14	4	1	20	233	0	3	4	1	0	0	7	7
2024-03-14	4	1	21	62	0	3	4	1	0	0	7	7
2024-03-14	4	1	22	77	0	3	4	1	0	0	7	7
2024-03-14	4	1	23	132	0	3	4	1	0	0	7	7
2024-03-14	4	1	0	61	1	4	1	1	0	0	10	14
2024-03-14	4	1	1	56	1	4	1	1	0	0	10	14
2024-03-14	4	1	2	72	1	4	1	1	0	0	10	14
2024-03-14	4	1	3	87	1	4	1	1	0	0	10	14
2024-03-14	4	1	4	84	1	4	1	1	0	0	10	14
2024-03-14	4	1	5	33	1	4	1	1	0	0	10	14
2024-03-14	4	1	6	237	1	4	1	1	0	0	10	14
2024-03-14	4	1	7	666	1	4	1	1	0	0	10	14
2024-03-14	4	1	8	513	1	4	1	1	0	0	10	14
2024-03-14	4	1	9	150	1	4	1	1	0	0	10	14
2024-03-14	4	1	10	450	1	4	1	1	0	0	10	14
2024-03-14	4	1	11	349	1	4	1	1	0	0	10	14
2024-03-14	4	1	12	327	1	4	1	1	0	0	10	14
2024-03-14	4	1	13	162	1	4	1	1	0	0	10	14
2024-03-14	4	1	14	136	1	4	1	1	0	0	10	14
2024-03-14	4	1	15	88	1	4	1	1	0	0	10	14
2024-03-14	4	1	16	144	1	4	1	1	0	0	10	14
2024-03-14	4	1	17	693	1	4	1	1	0	0	10	14
2024-03-14	4	1	18	198	1	4	1	1	0	0	10	14
2024-03-14	4	1	19	214	1	4	1	1	0	0	10	14
2024-03-14	4	1	20	330	1	4	1	1	0	0	10	14
2024-03-14	4	1	21	117	1	4	1	1	0	0	10	14
2024-03-14	4	1	22	141	1	4	1	1	0	0	10	14
2024-03-14	4	1	23	205	1	4	1	1	0	0	10	14
2024-03-15	5	1	0	45	1	4	1	1	0	0	10	10
2024-03-15	5	1	1	66	1	4	1	1	0	0	10	10
2024-03-15	5	1	2	42	1	4	1	1	0	0	10	10
2024-03-15	5	1	3	55	1	4	1	1	0	0	10	10
2024-03-15	5	1	4	34	1	4	1	1	0	0	10	10
2024-03-15	5	1	5	43	1	4	1	1	0	0	10	10
2024-03-15	5	1	6	351	1	4	1	1	0	0	10	10
2024-03-15	5	1	7	321	1	4	1	1	0	0	10	10
2024-03-15	5	1	8	393	1	4	1	1	0	0	10	10
2024-03-15	5	1	9	103	1	4	1	1	0	0	10	10
2024-03-15	5	1	10	81	1	4	1	1	0	0	10	10
2024-03-15	5	1	11	272	1	4	1	1	0	0	10	10
2024-03-15	5	1	12	334	1	4	1	1	0	0	10	10
2024-03-15	5	1	13	82	1	4	1	1	0	0	10	10
2024-03-15	5	1	14	225	1	4	1	1	0	0	10	10
2024-03-15	5	1	15	174	1	4	1	1	0	0	10	10
2024-03-15	5	1	16	294	1	4	1	1	0	0	10	10
2024-03-15	5	1	17	288	1	4	1	1	0	0	10	10
2024-03-15	5	1	18	600	1	4	1	1	0	0	10	10
2024-03-15	5	1	19	105	1	4	1	1	0	0	10	10
2024-03-15	5	1	20	118	1	4	1	1	0	0	10	10
2024-03-15	5	1	21	168	1	4	1	1	0	0	10	10
2024-03-15	5	1	22	213	1	4	1	1	0	0	10	10
2024-03-15	5	1	23	357	1	4	1	1	0	0	10	10
2024-03-15	5	1	0	55	0	3	4	1	0	0	7	7
2024-03-15	5	1	1	34	0	3	4	1	0	0	7	7
2024-03-15	5	1	2	52	0	3	4	1	0	0	7	7
2024-03-15	5	1	3	23	0	3	4	1	0	0	7	7
2024-03-15	5	1	4	31	0	3	4	1	0	0	7	7
2024-03-15	5	1	5	45	0	3	4	1	0	0	7	7
2024-03-15	5	1	6	179	0	3	4	1	0	0	7	7
2024-03-15	5	1	7	121	0	3	4	1	0	0	7	7
2024-03-15	5	1	8	499	0	3	4	1	0	0	7	7
2024-03-15	5	1	9	253	0	3	4	1	0	0	7	7
2024-03-15	5	1	10	280	0	3	4	1	0	0	7	7
2024-03-15	5	1	11	245	0	3	4	1	0	0	7	7
2024-03-15	5	1	12	176	0	3	4	1	0	0	7	7
2024-03-15	5	1	13	322	0	3	4	1	0	0	7	7
2024-03-15	5	1	14	240	0	3	4	1	0	0	7	7
2024-03-15	5	1	15	233	0	3	4	1	0	0	7	7
2024-03-15	5	1	16	218	0	3	4	1	0	0	7	7
2024-03-15	5	1	17	248	0	3	4	1	0	0	7	7
2024-03-15	5	1	18	422	0	3	4	1	0	0	7	7
2024-03-15	5	1	19	267	0	3	4	1	0	0	7	7
2024-03-15	5	1	20	310	0	3	4	1	0	0	7	7
2024-03-15	5	1	21	239	0	3	4	1	0	0	7	7
2024-03-15	5	1	22	294	0	3	4	1	0	0	7	7
2024-03-15	5	1	23	90	0	3	4	1	0	0	7	7
2024-03-15	5	1	0	60	1	4	1	1	0	0	10	14
2024-03-15	5	1	1	36	1	4	1	1	0	0	10	14
2024-03-15	5	1	2	89	1	4	1	1	0	0	10	14
2024-03-15	5	1	3	27	1	4	1	1	0	0	10	14
2024-03-15	5	1	4	42	1	4	1	1	0	0	10	14
2024-03-15	5	1	5	42	1	4	1	1	0	0	10	14
2024-03-15	5	1	6	306	1	4	1	1	0	0	10	14
2024-03-15	5	1	7	495	1	4	1	1	0	0	10	14
2024-03-15	5	1	8	522	1	4	1	1	0	0	10	14
2024-03-15	5	1	9	258	1	4	1	1	0	0	10	14
2024-03-15	5	1	10	439	1	4	1	1	0	0	10	14
2024-03-15	5	1	11	309	1	4	1	1	0	0	10	14
2024-03-15	5	1	12	229	1	4	1	1	0	0	10	14
2024-03-15	5	1	13	265	1	4	1	1	0	0	10	14
2024-03-15	5	1	14	133	1	4	1	1	0	0	10	14
2024-03-15	5	1	15	315	1	4	1	1	0	0	10	14
2024-03-15	5	1	16	342	1	4	1	1	0	0	10	14
2024-03-15	5	1	17	540	1	4	1	1	0	0	10	14
2024-03-15	5	1	18	861	1	4	1	1	0	0	10	14
2024-03-15	5	1	19	126	1	4	1	1	0	0	10	14
2024-03-15	5	1	20	430	1	4	1	1	0	0	10	14
2024-03-15	5	1	21	415	1	4	1	1	0	0	10	14
2024-03-15	5	1	22	372	1	4	1	1	0	0	10	14
2024-03-15	5	1	23	100	1	4	1	1	0	0	10	14
2024-03-16	6	0	0	107	1	4	1	1	0	0	10	10
2024-03-16	6	0	1	118	1	4	1	1	0	0	10	10
2024-03-16	6	0	2	78	1	4	1	1	0	0	10	10
2024-03-16	6	0	3	38	1	4	1	1	0	0	10	10
2024-03-16	6	0	4	54	1	4	1	1	0	0	10	10
2024-03-16	6	0	5	57	1	4	1	1	0	0	10	10
2024-03-16	6	0	6	506	1	4	1	1	0	0	10	10
2024-03-16	6	0	7	638	1	4	1	1	0	0	10	10
2024-03-16	6	0	8	672	1	4	1	1	0	0	10	10
2024-03-16	6	0	9	589	1	4	1	1	0	0	10	10
2024-03-16	6	0	10	540	1	4	1	1	0	0	10	10
2024-03-16	6	0	11	177	1	4	1	1	0	0	10	10
2024-03-16	6	0	12	186	1	4	1	1	0	0	10	10
2024-03-16	6	0	13	243	1	4	1	1	0	0	10	10
2024-03-16	6	0	14	339	1	4	1	1	0	0	10	10
2024-03-16	6	0	15	225	1	4	1	1	0	0	10	10
2024-03-16	6	0	16	175	1	4	1	1	0	0	10	10
2024-03-16	6	0	17	904	1	4	1	1	0	0	10	10
2024-03-16	6	0	18	991	1	4	1	1	0	0	10	10
2024-03-16	6	0	19	415	1	4	1	1	0	0	10	10
2024-03-16	6	0	20	494	1	4	1	1	0	0	10	10
2024-03-16	6	0	21	151	1	4	1	1	0	0	10	10
2024-03-16	6	0	22	528	1	4	1	1	0	0	10	10
2024-03-16	6	0	23	303	1	4	1	1	0	0	10	10
2024-03-16	6	0	0	56	0	3	4	1	0	0	7	7
2024-03-16	6	0	1	56	0	3	4	1	0	0	7	7
2024-03-16	6	0	2	82	0	3	4	1	0	0	7	7
2024-03-16	6	0	3	83	0	3	4	1	0	0	7	7
2024-03-16	6	0	4	47	0	3	4	1	0	0	7	7
2024-03-16	6	0	5	49	0	3	4	1	0	0	7	7
2024-03-16	6	0	6	467	0	3	4	1	0	0	7	7
2024-03-16	6	0	7	528	0	3	4	1	0	0	7	7
2024-03-16	6	0	8	895	0	3	4	1	0	0	7	7
2024-03-16	6	0	9	393	0	3	4	1	0	0	7	7
2024-03-16	6	0	10	207	0	3	4	1	0	0	7	7
2024-03-16	6	0	11	416	0	3	4	1	0	0	7	7
2024-03-16	6	0	12	135	0	3	4	1	0	0	7	7
2024-03-16	6	0	13	385	0	3	4	1	0	0	7	7
2024-03-16	6	0	14	163	0	3	4	1	0	0	7	7
2024-03-16	6	0	15	207	0	3	4	1	0	0	7	7
2024-03-16	6	0	16	268	0	3	4	1	0	0	7	7
2024-03-16	6	0	17	943	0	3	4	1	0	0	7	7
2024-03-16	6	0	18	1084	0	3	4	1	0	0	7	7
2024-03-16	6	0	19	114	0	3	4	1	0	0	7	7
2024-03-16	6	0	20	226	0	3	4	1	0	0	7	7
2024-03-16	6	0	21	308	0	3	4	1	0	0	7	7
2024-03-16	6	0	22	237	0	3	4	1	0	0	7	7
2024-03-16	6	0	23	426	0	3	4	1	0	0	7	7
2024-03-16	6	0	0	78	1	4	1	1	0	0	10	14
2024-03-16	6	0	1	146	1	4	1	1	0	0	10	14
2024-03-16	6	0	2	87	1	4	1	1	0	0	10	14
2024-03-16	6	0	3	122	1	4	1	1	0	0	10	14
2024-03-16	6	0	4	80	1	4	1	1	0	0	10	14
2024-03-16	6	0	5	110	1	4	1	1	0	0	10	14
2024-03-16	6	0	6	169	1	4	1	1	0	0	10	14
2024-03-16	6	0	7	1107	1	4	1	1	0	0	10	14
2024-03-16	6	0	8	1164	1	4	1	1	0	0	10	14
2024-03-16	6	0	9	391	1	4	1	1	0	0	10	14
2024-03-16	6	0	10	283	1	4	1	1	0	0	10	14
2024-03-16	6	0	11	363	1	4	1	1	0	0	10	14
2024-03-16	6	0	12	232	1	4	1	1	0	0	10	14
2024-03-16	6	0	13	186	1	4	1	1	0	0	10	14
2024-03-16	6	0	14	441	1	4	1	1	0	0	10	14
2024-03-16	6	0	15	408	1	4	1	1	0	0	10	14
2024-03-16	6	0	16	516	1	4	1	1	0	0	10	14
2024-03-16	6	0	17	1068	1	4	1	1	0	0	10	14
2024-03-16	6	0	18	1071	1	4	1	1	0	0	10	14
2024-03-16	6	0	19	489	1	4	1	1	0	0	10	14
2024-03-16	6	0	20	226	1	4	1	1	0	0	10	14
2024-03-16	6	0	21	340	1	4	1	1	0	0	10	14
2024-03-16	6	0	22	270	1	4	1	1	0	0	10	14
2024-03-16	6	0	23	424	1	4	1	1	0	0	10	14
2024-03-17	7	0	0	37	1	4	1	1	0	0	10	10
2024-03-17	7	0	1	54	1	4	1	1	0	0	10	10
2024-03-17	7	0	2	46	1	4	1	1	0	0	10	10
2024-03-17	7	0	3	83	1	4	1	1	0	0	10	10
2024-03-17	7	0	4	114	1	4	1	1	0	0	10	10
2024-03-17	7	0	5	86	1	4	1	1	0	0	10	10
2024-03-17	7	0	6	201	1	4	1	1	0	0	10	10
2024-03-17	7	0	7	799	1	4	1	1	0	0	10	10
2024-03-17	7	0	8	1034	1	4	1	1	0	0	10	10
2024-03-17	7	0	9	140	1	4	1	1	0	0	10	10
2024-03-17	7	0	10	163	1	4	1	1	0	0	10	10
2024-03-17	7	0	11	494	1	4	1	1	0	0	10	10
2024-03-17	7	0	12	592	1	4	1	1	0	0	10	10
2024-03-17	7	0	13	460	1	4	1	1	0	0	10	10
2024-03-17	7	0	14	234	1	4	1	1	0	0	10	10
2024-03-17	7	0	15	585	1	4	1	1	0	0	10	10
2024-03-17	7	0	16	429	1	4	1	1	0	0	10	10
2024-03-17	7	0	17	816	1	4	1	1	0	0	10	10
2024-03-17	7	0	18	424	1	4	1	1	0	0	10	10
2024-03-17	7	0	19	223	1	4	1	1	0	0	10	10
2024-03-17	7	0	20	466	1	4	1	1	0	0	10	10
2024-03-17	7	0	21	217	1	4	1	1	0	0	10	10
2024-03-17	7	0	22	315	1	4	1	1	0	0	10	10
2024-03-17	7	0	23	285	1	4	1	1	0	0	10	10
2024-03-17	7	0	0	50	0	3	4	1	0	0	7	7
2024-03-17	7	0	1	91	0	3	4	1	0	0	7	7
2024-03-17	7	0	2	87	0	3	4	1	0	0	7	7
2024-03-17	7	0	3	106	0	3	4	1	0	0	7	7
2024-03-17	7	0	4	28	0	3	4	1	0	0	7	7
2024-03-17	7	0	5	88	0	3	4	1	0	0	7	7
2024-03-17	7	0	6	319	0	3	4	1	0	0	7	7
2024-03-17	7	0	7	363	0	3	4	1	0	0	7	7
2024-03-17	7	0	8	1047	0	3	4	1	0	0	7	7
2024-03-17	7	0	9	431	0	3	4	1	0	0	7	7
2024-03-17	7	0	10	294	0	3	4	1	0	0	7	7
2024-03-17	7	0	11	281	0	3	4	1	0	0	7	7
2024-03-17	7	0	12	498	0	3	4	1	0	0	7	7
2024-03-17	7	0	13	324	0	3	4	1	0	0	7	7
2024-03-17	7	0	14	193	0	3	4	1	0	0	7	7
2024-03-17	7	0	15	221	0	3	4	1	0	0	7	7
2024-03-17	7	0	16	207	0	3	4	1	0	0	7	7
2024-03-17	7	0	17	233	0	3	4	1	0	0	7	7
2024-03-17	7	0	18	470	0	3	4	1	0	0	7	7
2024-03-17	7	0	19	372	0	3	4	1	0	0	7	7
2024-03-17	7	0	20	372	0	3	4	1	0	0	7	7
2024-03-17	7	0	21	295	0	3	4	1	0	0	7	7
2024-03-17	7	0	22	388	0	3	4	1	0	0	7	7
2024-03-17	7	0	23	348	0	3	4	1	0	0	7	7
2024-03-17	7	0	0	120	1	4	1	1	0	0	10	14
2024-03-17	7	0	1	96	1	4	1	1	0	0	10	14
2024-03-17	7	0	2	30	1	4	1	1	0	0	10	14
2024-03-17	7	0	3	144	1	4	1	1	0	0	10	14
2024-03-17	7	0	4	138	1	4	1	1	0	0	10	14
2024-03-17	7	0	5	40	1	4	1	1	0	0	10	14
2024-03-17	7	0	6	663	1	4	1	1	0	0	10	14
2024-03-17	7	0	7	453	1	4	1	1	0	0	10	14
2024-03-17	7	0	8	510	1	4	1	1	0	0	10	14
2024-03-17	7	0	9	591	1	4	1	1	0	0	10	14
2024-03-17	7	0	10	540	1	4	1	1	0	0	10	14
2024-03-17	7	0	11	646	1	4	1	1	0	0	10	14
2024-03-17	7	0	12	705	1	4	1	1	0	0	10	14
2024-03-17	7	0	13	531	1	4	1	1	0	0	10	14
2024-03-17	7	0	14	613	1	4	1	1	0	0	10	14
2024-03-17	7	0	15	585	1	4	1	1	0	0	10	14
2024-03-17	7	0	16	360	1	4	1	1	0	0	10	14
2024-03-17	7	0	17	1362	1	4	1	1	0	0	10	14
2024-03-17	7	0	18	717	1	4	1	1	0	0	10	14
2024-03-17	7	0	19	571	1	4	1	1	0	0	10	14
2024-03-17	7	0	20	307	1	4	1	1	0	0	10	14
2024-03-17	7	0	21	496	1	4	1	1	0	0	10	14
2024-03-17	7	0	22	421	1	4	1	1	0	0	10	14
2024-03-17	7	0	23	295	1	4	1	1	0	0	10	14
2024-03-18	1	1	0	26	1	4	1	1	0	0	10	10
2024-03-18	1	1	1	18	1	4	1	1	0	0	10	10
2024-03-18	1	1	2	70	1	4	1	1	0	0	10	10
2024-03-18	1	1	3	36	1	4	1	1	0	0	10	10
2024-03-18	1	1	4	16	1	4	1	1	0	0	10	10
2024-03-18	1	1	5	20	1	4	1	1	0	0	10	10
2024-03-18	1	1	6	231	1	4	1	1	0	0	10	10
2024-03-18	1	1	7	345	1	4	1	1	0	0	10	10
2024-03-18	1	1	8	636	1	4	1	1	0	0	10	10
2024-03-18	1	1	9	206	1	4	1	1	0	0	10	10
2024-03-18	1	1	10	92	1	4	1	1	0	0	10	10
2024-03-18	1	1	11	150	1	4	1	1	0	0	10	10
2024-03-18	1	1	12	356	1	4	1	1	0	0	10	10
2024-03-18	1	1	13	201	1	4	1	1	0	0	10	10
2024-03-18	1	1	14	166	1	4	1	1	0	0	10	10
2024-03-18	1	1	15	84	1	4	1	1	0	0	10	10
2024-03-18	1	1	16	60	1	4	1	1	0	0	10	10
2024-03-18	1	1	17	691	1	4	1	1	0	0	10	10
2024-03-18	1	1	18	652	1	4	1	1	0	0	10	10
2024-03-18	1	1	19	277	1	4	1	1	0	0	10	10
2024-03-18	1	1	20	253	1	4	1	1	0	0	10	10
2024-03-18	1	1	21	272	1	4	1	1	0	0	10	10
2024-03-18	1	1	22	266	1	4	1	1	0	0	10	10
2024-03-18	1	1	23	109	1	4	1	1	0	0	10	10
2024-03-18	1	1	0	56	0	3	4	1	0	0	7	7
2024-03-18	1	1	1	57	0	3	4	1	0	0	7	7
2024-03-18	1	1	2	33	0	3	4	1	0	0	7	7
2024-03-18	1	1	3	24	0	3	4	1	0	0	7	7
2024-03-18	1	1	4	38	0	3	4	1	0	0	7	7
2024-03-18	1	1	5	18	0	3	4	1	0	0	7	7
2024-03-18	1	1	6	181	0	3	4	1	0	0	7	7
2024-03-18	1	1	7	435	0	3	4	1	0	0	7	7
2024-03-18	1	1	8	495	0	3	4	1	0	0	7	7
2024-03-18	1	1	9	203	0	3	4	1	0	0	7	7
2024-03-18	1	1	10	116	0	3	4	1	0	0	7	7
2024-03-18	1	1	11	146	0	3	4	1	0	0	7	7
2024-03-18	1	1	12	281	0	3	4	1	0	0	7	7
2024-03-18	1	1	13	86	0	3	4	1	0	0	7	7
2024-03-18	1	1	14	71	0	3	4	1	0	0	7	7
2024-03-18	1	1	15	297	0	3	4	1	0	0	7	7
2024-03-18	1	1	16	60	0	3	4	1	0	0	7	7
2024-03-18	1	1	17	565	0	3	4	1	0	0	7	7
2024-03-18	1	1	18	281	0	3	4	1	0	0	7	7
2024-03-18	1	1	19	91	0	3	4	1	0	0	7	7
2024-03-18	1	1	20	173	0	3	4	1	0	0	7	7
2024-03-18	1	1	21	301	0	3	4	1	0	0	7	7
2024-03-18	1	1	22	206	0	3	4	1	0	0	7	7
2024-03-18	1	1	23	196	0	3	4	1	0	0	7	7
2024-03-18	1	1	0	26	1	4	1	1	0	0	10	14
2024-03-18	1	1	1	24	1	4	1	1	0	0	10	14
2024-03-18	1	1	2	34	1	4	1	1	0	0	10	14
2024-03-18	1	1	3	21	1	4	1	1	0	0	10	14
2024-03-18	1	1	4	36	1	4	1	1	0	0	10	14
2024-03-18	1	1	5	81	1	4	1	1	0	0	10	14
2024-03-18	1	1	6	199	1	4	1	1	0	0	10	14
2024-03-18	1	1	7	753	1	4	1	1	0	0	10	14
2024-03-18	1	1	8	570	1	4	1	1	0	0	10	14
2024-03-18	1	1	9	402	1	4	1	1	0	0	10	14
2024-03-18	1	1	10	198	1	4	1	1	0	0	10	14
2024-03-18	1	1	11	81	1	4	1	1	0	0	10	14
2024-03-18	1	1	12	357	1	4	1	1	0	0	10	14
2024-03-18	1	1	13	123	1	4	1	1	0	0	10	14
2024-03-18	1	1	14	366	1	4	1	1	0	0	10	14
2024-03-18	1	1	15	139	1	4	1	1	0	0	10	14
2024-03-18	1	1	16	205	1	4	1	1	0	0	10	14
2024-03-18	1	1	17	690	1	4	1	1	0	0	10	14
2024-03-18	1	1	18	612	1	4	1	1	0	0	10	14
2024-03-18	1	1	19	97	1	4	1	1	0	0	10	14
2024-03-18	1	1	20	255	1	4	1	1	0	0	10	14
2024-03-18	1	1	21	123	1	4	1	1	0	0	10	14
2024-03-18	1	1	22	345	1	4	1	1	0	0	10	14
2024-03-18	1	1	23	294	1	4	1	1	0	0	10	14
2024-03-19	2	1	0	17	1	4	1	1	0	0	10	10
2024-03-19	2	1	1	14	1	4	1	1	0	0	10	10
2024-03-19	2	1	2	56	1	4	1	1	0	0	10	10
2024-03-19	2	1	3	53	1	4	1	1	0	0	10	10
2024-03-19	2	1	4	22	1	4	1	1	0	0	10	10
2024-03-19	2	1	5	64	1	4	1	1	0	0	10	10
2024-03-19	2	1	6	114	1	4	1	1	0	0	10	10
2024-03-19	2	1	7	595	1	4	1	1	0	0	10	10
2024-03-19	2	1	8	501	1	4	1	1	0	0	10	10
2024-03-19	2	1	9	342	1	4	1	1	0	0	10	10
2024-03-19	2	1	10	81	1	4	1	1	0	0	10	10
2024-03-19	2	1	11	175	1	4	1	1	0	0	10	10
2024-03-19	2	1	12	147	1	4	1	1	0	0	10	10
2024-03-19	2	1	13	153	1	4	1	1	0	0	10	10
2024-03-19	2	1	14	192	1	4	1	1	0	0	10	10
2024-03-19	2	1	15	178	1	4	1	1	0	0	10	10
2024-03-19	2	1	16	228	1	4	1	1	0	0	10	10
2024-03-19	2	1	17	201	1	4	1	1	0	0	10	10
2024-03-19	2	1	18	559	1	4	1	1	0	0	10	10
2024-03-19	2	1	19	158	1	4	1	1	0	0	10	10
2024-03-19	2	1	20	138	1	4	1	1	0	0	10	10
2024-03-19	2	1	21	232	1	4	1	1	0	0	10	10
2024-03-19	2	1	22	278	1	4	1	1	0	0	10	10
2024-03-19	2	1	23	132	1	4	1	1	0	0	10	10
2024-03-19	2	1	0	52	0	3	4	1	0	0	7	7
2024-03-19	2	1	1	65	0	3	4	1	0	0	7	7
2024-03-19	2	1	2	44	0	3	4	1	0	0	7	7
2024-03-19	2	1	3	18	0	3	4	1	0	0	7	7
2024-03-19	2	1	4	14	0	3	4	1	0	0	7	7
2024-03-19	2	1	5	12	0	3	4	1	0	0	7	7
2024-03-19	2	1	6	283	0	3	4	1	0	0	7	7
2024-03-19	2	1	7	301	0	3	4	1	0	0	7	7
2024-03-19	2	1	8	655	0	3	4	1	0	0	7	7
2024-03-19	2	1	9	126	0	3	4	1	0	0	7	7
2024-03-19	2	1	10	236	0	3	4	1	0	0	7	7
2024-03-19	2	1	11	127	0	3	4	1	0	0	7	7
2024-03-19	2	1	12	136	0	3	4	1	0	0	7	7
2024-03-19	2	1	13	194	0	3	4	1	0	0	7	7
2024-03-19	2	1	14	264	0	3	4	1	0	0	7	7
2024-03-19	2	1	15	101	0	3	4	1	0	0	7	7
2024-03-19	2	1	16	286	0	3	4	1	0	0	7	7
2024-03-19	2	1	17	308	0	3	4	1	0	0	7	7
2024-03-19	2	1	18	424	0	3	4	1	0	0	7	7
2024-03-19	2	1	19	163	0	3	4	1	0	0	7	7
2024-03-19	2	1	20	236	0	3	4	1	0	0	7	7
2024-03-19	2	1	21	147	0	3	4	1	0	0	7	7
2024-03-19	2	1	22	93	0	3	4	1	0	0	7	7
2024-03-19	2	1	23	202	0	3	4	1	0	0	7	7
2024-03-19	2	1	0	21	1	4	1	1	0	0	10	14
2024-03-19	2	1	1	72	1	4	1	1	0	0	10	14
2024-03-19	2	1	2	50	1	4	1	1	0	0	10	14
2024-03-19	2	1	3	23	1	4	1	1	0	0	10	14
2024-03-19	2	1	4	58	1	4	1	1	0	0	10	14
2024-03-19	2	1	5	16	1	4	1	1	0	0	10	14
2024-03-19	2	1	6	175	1	4	1	1	0	0	10	14
2024-03-19	2	1	7	768	1	4	1	1	0	0	10	14
2024-03-19	2	1	8	255	1	4	1	1	0	0	10	14
2024-03-19	2	1	9	178	1	4	1	1	0	0	10	14
2024-03-19	2	1	10	255	1	4	1	1	0	0	10	14
2024-03-19	2	1	11	108	1	4	1	1	0	0	10	14
2024-03-19	2	1	12	258	1	4	1	1	0	0	10	14
2024-03-19	2	1	13	450	1	4	1	1	0	0	10	14
2024-03-19	2	1	14	205	1	4	1	1	0	0	10	14
2024-03-19	2	1	15	294	1	4	1	1	0	0	10	14
2024-03-19	2	1	16	417	1	4	1	1	0	0	10	14
2024-03-19	2	1	17	774	1	4	1	1	0	0	10	14
2024-03-19	2	1	18	585	1	4	1	1	0	0	10	14
2024-03-19	2	1	19	175	1	4	1	1	0	0	10	14
2024-03-19	2	1	20	348	1	4	1	1	0	0	10	14
2024-03-19	2	1	21	234	1	4	1	1	0	0	10	14
2024-03-19	2	1	22	319	1	4	1	1	0	0	10	14
2024-03-19	2	1	23	189	1	4	1	1	0	0	10	14
2024-03-20	3	1	0	18	1	4	1	1	0	0	10	10
2024-03-20	3	1	1	30	1	4	1	1	0	0	10	10
2024-03-20	3	1	2	61	1	4	1	1	0	0	10	10
2024-03-20	3	1	3	60	1	4	1	1	0	0	10	10
2024-03-20	3	1	4	63	1	4	1	1	0	0	10	10
2024-03-20	3	1	5	51	1	4	1	1	0	0	10	10
2024-03-20	3	1	6	214	1	4	1	1	0	0	10	10
2024-03-20	3	1	7	715	1	4	1	1	0	0	10	10
2024-03-20	3	1	8	331	1	4	1	1	0	0	10	10
2024-03-20	3	1	9	229	1	4	1	1	0	0	10	10
2024-03-20	3	1	10	132	1	4	1	1	0	0	10	10
2024-03-20	3	1	11	116	1	4	1	1	0	0	10	10
2024-03-20	3	1	12	304	1	4	1	1	0	0	10	10
2024-03-20	3	1	13	146	1	4	1	1	0	0	10	10
2024-03-20	3	1	14	282	1	4	1	1	0	0	10	10
2024-03-20	3	1	15	154	1	4	1	1	0	0	10	10
2024-03-20	3	1	16	187	1	4	1	1	0	0	10	10
2024-03-20	3	1	17	655	1	4	1	1	0	0	10	10
2024-03-20	3	1	18	638	1	4	1	1	0	0	10	10
2024-03-20	3	1	19	201	1	4	1	1	0	0	10	10
2024-03-20	3	1	20	256	1	4	1	1	0	0	10	10
2024-03-20	3	1	21	146	1	4	1	1	0	0	10	10
2024-03-20	3	1	22	135	1	4	1	1	0	0	10	10
2024-03-20	3	1	23	153	1	4	1	1	0	0	10	10
2024-03-20	3	1	0	60	0	3	4	1	0	0	7	7
2024-03-20	3	1	1	56	0	3	4	1	0	0	7	7
2024-03-20	3	1	2	55	0	3	4	1	0	0	7	7
2024-03-20	3	1	3	53	0	3	4	1	0	0	7	7
2024-03-20	3	1	4	16	0	3	4	1	0	0	7	7
2024-03-20	3	1	5	47	0	3	4	1	0	0	7	7
2024-03-20	3	1	6	210	0	3	4	1	0	0	7	7
2024-03-20	3	1	7	587	0	3	4	1	0	0	7	7
2024-03-20	3	1	8	473	0	3	4	1	0	0	7	7
2024-03-20	3	1	9	146	0	3	4	1	0	0	7	7
2024-03-20	3	1	10	162	0	3	4	1	0	0	7	7
2024-03-20	3	1	11	59	0	3	4	1	0	0	7	7
2024-03-20	3	1	12	184	0	3	4	1	0	0	7	7
2024-03-20	3	1	13	203	0	3	4	1	0	0	7	7
2024-03-20	3	1	14	151	0	3	4	1	0	0	7	7
2024-03-20	3	1	15	199	0	3	4	1	0	0	7	7
2024-03-20	3	1	16	122	0	3	4	1	0	0	7	7
2024-03-20	3	1	17	125	0	3	4	1	0	0	7	7
2024-03-20	3	1	18	393	0	3	4	1	0	0	7	7
2024-03-20	3	1	19	216	0	3	4	1	0	0	7	7
2024-03-20	3	1	20	311	0	3	4	1	0	0	7	7
2024-03-20	3	1	21	203	0	3	4	1	0	0	7	7
2024-03-20	3	1	22	273	0	3	4	1	0	0	7	7
2024-03-20	3	1	23	178	0	3	4	1	0	0	7	7
2024-03-20	3	1	0	70	1	4	1	1	0	0	10	14
2024-03-20	3	1	1	48	1	4	1	1	0	0	10	14
2024-03-20	3	1	2	84	1	4	1	1	0	0	10	14
2024-03-20	3	1	3	28	1	4	1	1	0	0	10	14
2024-03-20	3	1	4	57	1	4	1	1	0	0	10	14
2024-03-20	3	1	5	69	1	4	1	1	0	0	10	14
2024-03-20	3	1	6	100	1	4	1	1	0	0	10	14
2024-03-20	3	1	7	162	1	4	1	1	0	0	10	14
2024-03-20	3	1	8	615	1	4	1	1	0	0	10	14
2024-03-20	3	1	9	447	1	4	1	1	0	0	10	14
2024-03-20	3	1	10	111	1	4	1	1	0	0	10	14
2024-03-20	3	1	11	334	1	4	1	1	0	0	10	14
2024-03-20	3	1	12	274	1	4	1	1	0	0	10	14
2024-03-20	3	1	13	178	1	4	1	1	0	0	10	14
2024-03-20	3	1	14	331	1	4	1	1	0	0	10	14
2024-03-20	3	1	15	336	1	4	1	1	0	0	10	14
2024-03-20	3	1	16	252	1	4	1	1	0	0	10	14
2024-03-20	3	1	17	855	1	4	1	1	0	0	10	14
2024-03-20	3	1	18	516	1	4	1	1	0	0	10	14
2024-03-20	3	1	19	292	1	4	1	1	0	0	10	14
2024-03-20	3	1	20	138	1	4	1	1	0	0	10	14
2024-03-20	3	1	21	420	1	4	1	1	0	0	10	14
2024-03-20	3	1	22	106	1	4	1	1	0	0	10	14
2024-03-20	3	1	23	216	1	4	1	1	0	0	10	14
2024-03-21	4	1	0	68	1	4	1	1	0	0	10	10
2024-03-21	4	1	1	71	1	4	1	1	0	0	10	10
2024-03-21	4	1	2	66	1	4	1	1	0	0	10	10
2024-03-21	4	1	3	35	1	4	1	1	0	0	10	10
2024-03-21	4	1	4	45	1	4	1	1	0	0	10	10
2024-03-21	4	1	5	40	1	4	1	1	0	0	10	10
2024-03-21	4	1	6	140	1	4	1	1	0	0	10	10
2024-03-21	4	1	7	592	1	4	1	1	0	0	10	10
2024-03-21	4	1	8	612	1	4	1	1	0	0	10	10
2024-03-21	4	1	9	332	1	4	1	1	0	0	10	10
2024-03-21	4	1	10	223	1	4	1	1	0	0	10	10
2024-03-21	4	1	11	307	1	4	1	1	0	0	10	10
2024-03-21	4	1	12	289	1	4	1	1	0	0	10	10
2024-03-21	4	1	13	256	1	4	1	1	0	0	10	10
2024-03-21	4	1	14	156	1	4	1	1	0	0	10	10
2024-03-21	4	1	15	314	1	4	1	1	0	0	10	10
2024-03-21	4	1	16	315	1	4	1	1	0	0	10	10
2024-03-21	4	1	17	475	1	4	1	1	0	0	10	10
2024-03-21	4	1	18	672	1	4	1	1	0	0	10	10
2024-03-21	4	1	19	225	1	4	1	1	0	0	10	10
2024-03-21	4	1	20	195	1	4	1	1	0	0	10	10
2024-03-21	4	1	21	222	1	4	1	1	0	0	10	10
2024-03-21	4	1	22	247	1	4	1	1	0	0	10	10
2024-03-21	4	1	23	172	1	4	1	1	0	0	10	10
2024-03-21	4	1	0	44	0	3	4	1	0	0	7	7
2024-03-21	4	1	1	18	0	3	4	1	0	0	7	7
2024-03-21	4	1	2	55	0	3	4	1	0	0	7	7
2024-03-21	4	1	3	35	0	3	4	1	0	0	7	7
2024-03-21	4	1	4	54	0	3	4	1	0	0	7	7
2024-03-21	4	1	5	13	0	3	4	1	0	0	7	7
2024-03-21	4	1	6	112	0	3	4	1	0	0	7	7
2024-03-21	4	1	7	479	0	3	4	1	0	0	7	7
2024-03-21	4	1	8	275	0	3	4	1	0	0	7	7
2024-03-21	4	1	9	75	0	3	4	1	0	0	7	7
2024-03-21	4	1	10	154	0	3	4	1	0	0	7	7
2024-03-21	4	1	11	161	0	3	4	1	0	0	7	7
2024-03-21	4	1	12	113	0	3	4	1	0	0	7	7
2024-03-21	4	1	13	174	0	3	4	1	0	0	7	7
2024-03-21	4	1	14	144	0	3	4	1	0	0	7	7
2024-03-21	4	1	15	227	0	3	4	1	0	0	7	7
2024-03-21	4	1	16	255	0	3	4	1	0	0	7	7
2024-03-21	4	1	17	242	0	3	4	1	0	0	7	7
2024-03-21	4	1	18	613	0	3	4	1	0	0	7	7
2024-03-21	4	1	19	276	0	3	4	1	0	0	7	7
2024-03-21	4	1	20	67	0	3	4	1	0	0	7	7
2024-03-21	4	1	21	114	0	3	4	1	0	0	7	7
2024-03-21	4	1	22	80	0	3	4	1	0	0	7	7
2024-03-21	4	1	23	308	0	3	4	1	0	0	7	7
2024-03-21	4	1	0	35	1	4	1	1	0	0	10	14
2024-03-21	4	1	1	49	1	4	1	1	0	0	10	14
2024-03-21	4	1	2	21	1	4	1	1	0	0	10	14
2024-03-21	4	1	3	83	1	4	1	1	0	0	10	14
2024-03-21	4	1	4	86	1	4	1	1	0	0	10	14
2024-03-21	4	1	5	39	1	4	1	1	0	0	10	14
2024-03-21	4	1	6	303	1	4	1	1	0	0	10	14
2024-03-21	4	1	7	591	1	4	1	1	0	0	10	14
2024-03-21	4	1	8	204	1	4	1	1	0	0	10	14
2024-03-21	4	1	9	387	1	4	1	1	0	0	10	14
2024-03-21	4	1	10	277	1	4	1	1	0	0	10	14
2024-03-21	4	1	11	336	1	4	1	1	0	0	10	14
2024-03-21	4	1	12	190	1	4	1	1	0	0	10	14
2024-03-21	4	1	13	222	1	4	1	1	0	0	10	14
2024-03-21	4	1	14	418	1	4	1	1	0	0	10	14
2024-03-21	4	1	15	355	1	4	1	1	0	0	10	14
2024-03-21	4	1	16	433	1	4	1	1	0	0	10	14
2024-03-21	4	1	17	546	1	4	1	1	0	0	10	14
2024-03-21	4	1	18	747	1	4	1	1	0	0	10	14
2024-03-21	4	1	19	436	1	4	1	1	0	0	10	14
2024-03-21	4	1	20	361	1	4	1	1	0	0	10	14
2024-03-21	4	1	21	292	1	4	1	1	0	0	10	14
2024-03-21	4	1	22	130	1	4	1	1	0	0	10	14
2024-03-21	4	1	23	286	1	4	1	1	0	0	10	14
2024-03-22	5	1	0	63	1	4	1	1	0	0	10	10
2024-03-22	5	1	1	25	1	4	1	1	0	0	10	10
2024-03-22	5	1	2	57	1	4	1	1	0	0	10	10
2024-03-22	5	1	3	60	1	4	1	1	0	0	10	10
2024-03-22	5	1	4	17	1	4	1	1	0	0	10	10
2024-03-22	5	1	5	50	1	4	1	1	0	0	10	10
2024-03-22	5	1	6	158	1	4	1	1	0	0	10	10
2024-03-22	5	1	7	451	1	4	1	1	0	0	10	10
2024-03-22	5	1	8	343	1	4	1	1	0	0	10	10
2024-03-22	5	1	9	164	1	4	1	1	0	0	10	10
2024-03-22	5	1	10	348	1	4	1	1	0	0	10	10
2024-03-22	5	1	11	138	1	4	1	1	0	0	10	10
2024-03-22	5	1	12	162	1	4	1	1	0	0	10	10
2024-03-22	5	1	13	254	1	4	1	1	0	0	10	10
2024-03-22	5	1	14	116	1	4	1	1	0	0	10	10
2024-03-22	5	1	15	110	1	4	1	1	0	0	10	10
2024-03-22	5	1	16	127	1	4	1	1	0	0	10	10
2024-03-22	5	1	17	280	1	4	1	1	0	0	10	10
2024-03-22	5	1	18	309	1	4	1	1	0	0	10	10
2024-03-22	5	1	19	216	1	4	1	1	0	0	10	10
2024-03-22	5	1	20	276	1	4	1	1	0	0	10	10
2024-03-22	5	1	21	222	1	4	1	1	0	0	10	10
2024-03-22	5	1	22	87	1	4	1	1	0	0	10	10
2024-03-22	5	1	23	352	1	4	1	1	0	0	10	10
2024-03-22	5	1	0	24	0	3	4	1	0	0	7	7
2024-03-22	5	1	1	27	0	3	4	1	0	0	7	7
2024-03-22	5	1	2	51	0	3	4	1	0	0	7	7
2024-03-22	5	1	3	58	0	3	4	1	0	0	7	7
2024-03-22	5	1	4	63	0	3	4	1	0	0	7	7
2024-03-22	5	1	5	56	0	3	4	1	0	0	7	7
2024-03-22	5	1	6	88	0	3	4	1	0	0	7	7
2024-03-22	5	1	7	567	0	3	4	1	0	0	7	7
2024-03-22	5	1	8	446	0	3	4	1	0	0	7	7
2024-03-22	5	1	9	111	0	3	4	1	0	0	7	7
2024-03-22	5	1	10	315	0	3	4	1	0	0	7	7
2024-03-22	5	1	11	104	0	3	4	1	0	0	7	7
2024-03-22	5	1	12	100	0	3	4	1	0	0	7	7
2024-03-22	5	1	13	172	0	3	4	1	0	0	7	7
2024-03-22	5	1	14	271	0	3	4	1	0	0	7	7
2024-03-22	5	1	15	221	0	3	4	1	0	0	7	7
2024-03-22	5	1	16	183	0	3	4	1	0	0	7	7
2024-03-22	5	1	17	429	0	3	4	1	0	0	7	7
2024-03-22	5	1	18	149	0	3	4	1	0	0	7	7
2024-03-22	5	1	19	190	0	3	4	1	0	0	7	7
2024-03-22	5	1	20	188	0	3	4	1	0	0	7	7
2024-03-22	5	1	21	94	0	3	4	1	0	0	7	7
2024-03-22	5	1	22	253	0	3	4	1	0	0	7	7
2024-03-22	5	1	23	118	0	3	4	1	0	0	7	7
2024-03-22	5	1	0	42	1	4	1	1	0	0	10	14
2024-03-22	5	1	1	78	1	4	1	1	0	0	10	14
2024-03-22	5	1	2	86	1	4	1	1	0	0	10	14
2024-03-22	5	1	3	67	1	4	1	1	0	0	10	14
2024-03-22	5	1	4	44	1	4	1	1	0	0	10	14
2024-03-22	5	1	5	38	1	4	1	1	0	0	10	14
2024-03-22	5	1	6	81	1	4	1	1	0	0	10	14
2024-03-22	5	1	7	480	1	4	1	1	0	0	10	14
2024-03-22	5	1	8	390	1	4	1	1	0	0	10	14
2024-03-22	5	1	9	184	1	4	1	1	0	0	10	14
2024-03-22	5	1	10	384	1	4	1	1	0	0	10	14
2024-03-22	5	1	11	126	1	4	1	1	0	0	10	14
2024-03-22	5	1	12	307	1	4	1	1	0	0	10	14
2024-03-22	5	1	13	324	1	4	1	1	0	0	10	14
2024-03-22	5	1	14	76	1	4	1	1	0	0	10	14
2024-03-22	5	1	15	409	1	4	1	1	0	0	10	14
2024-03-22	5	1	16	382	1	4	1	1	0	0	10	14
2024-03-22	5	1	17	522	1	4	1	1	0	0	10	14
2024-03-22	5	1	18	669	1	4	1	1	0	0	10	14
2024-03-22	5	1	19	195	1	4	1	1	0	0	10	14
2024-03-22	5	1	20	172	1	4	1	1	0	0	10	14
2024-03-22	5	1	21	121	1	4	1	1	0	0	10	14
2024-03-22	5	1	22	339	1	4	1	1	0	0	10	14
2024-03-22	5	1	23	442	1	4	1	1	0	0	10	14
2024-03-23	6	0	0	99	1	4	1	1	0	0	10	10
2024-03-23	6	0	1	108	1	4	1	1	0	0	10	10
2024-03-23	6	0	2	91	1	4	1	1	0	0	10	10
2024-03-23	6	0	3	77	1	4	1	1	0	0	10	10
2024-03-23	6	0	4	67	1	4	1	1	0	0	10	10
2024-03-23	6	0	5	96	1	4	1	1	0	0	10	10
2024-03-23	6	0	6	445	1	4	1	1	0	0	10	10
2024-03-23	6	0	7	794	1	4	1	1	0	0	10	10
2024-03-23	6	0	8	1137	1	4	1	1	0	0	10	10
2024-03-23	6	0	9	235	1	4	1	1	0	0	10	10
2024-03-23	6	0	10	424	1	4	1	1	0	0	10	10
2024-03-23	6	0	11	478	1	4	1	1	0	0	10	10
2024-03-23	6	0	12	573	1	4	1	1	0	0	10	10
2024-03-23	6	0	13	457	1	4	1	1	0	0	10	10
2024-03-23	6	0	14	422	1	4	1	1	0	0	10	10
2024-03-23	6	0	15	309	1	4	1	1	0	0	10	10
2024-03-23	6	0	16	396	1	4	1	1	0	0	10	10
2024-03-23	6	0	17	417	1	4	1	1	0	0	10	10
2024-03-23	6	0	18	374	1	4	1	1	0	0	10	10
2024-03-23	6	0	19	600	1	4	1	1	0	0	10	10
2024-03-23	6	0	20	291	1	4	1	1	0	0	10	10
2024-03-23	6	0	21	333	1	4	1	1	0	0	10	10
2024-03-23	6	0	22	170	1	4	1	1	0	0	10	10
2024-03-23	6	0	23	163	1	4	1	1	0	0	10	10
2024-03-23	6	0	0	102	0	3	4	1	0	0	7	7
2024-03-23	6	0	1	42	0	3	4	1	0	0	7	7
2024-03-23	6	0	2	95	0	3	4	1	0	0	7	7
2024-03-23	6	0	3	87	0	3	4	1	0	0	7	7
2024-03-23	6	0	4	107	0	3	4	1	0	0	7	7
2024-03-23	6	0	5	42	0	3	4	1	0	0	7	7
2024-03-23	6	0	6	492	0	3	4	1	0	0	7	7
2024-03-23	6	0	7	1086	0	3	4	1	0	0	7	7
2024-03-23	6	0	8	422	0	3	4	1	0	0	7	7
2024-03-23	6	0	9	357	0	3	4	1	0	0	7	7
2024-03-23	6	0	10	429	0	3	4	1	0	0	7	7
2024-03-23	6	0	11	441	0	3	4	1	0	0	7	7
2024-03-23	6	0	12	269	0	3	4	1	0	0	7	7
2024-03-23	6	0	13	394	0	3	4	1	0	0	7	7
2024-03-23	6	0	14	316	0	3	4	1	0	0	7	7
2024-03-23	6	0	15	500	0	3	4	1	0	0	7	7
2024-03-23	6	0	16	270	0	3	4	1	0	0	7	7
2024-03-23	6	0	17	695	0	3	4	1	0	0	7	7
2024-03-23	6	0	18	235	0	3	4	1	0	0	7	7
2024-03-23	6	0	19	498	0	3	4	1	0	0	7	7
2024-03-23	6	0	20	476	0	3	4	1	0	0	7	7
2024-03-23	6	0	21	210	0	3	4	1	0	0	7	7
2024-03-23	6	0	22	224	0	3	4	1	0	0	7	7
2024-03-23	6	0	23	343	0	3	4	1	0	0	7	7
2024-03-23	6	0	0	144	1	4	1	1	0	0	10	14
2024-03-23	6	0	1	132	1	4	1	1	0	0	10	14
2024-03-23	6	0	2	92	1	4	1	1	0	0	10	14
2024-03-23	6	0	3	145	1	4	1	1	0	0	10	14
2024-03-23	6	0	4	34	1	4	1	1	0	0	10	14
2024-03-23	6	0	5	31	1	4	1	1	0	0	10	14
2024-03-23	6	0	6	550	1	4	1	1	0	0	10	14
2024-03-23	6	0	7	1425	1	4	1	1	0	0	10	14
2024-03-23	6	0	8	1119	1	4	1	1	0	0	10	14
2024-03-23	6	0	9	631	1	4	1	1	0	0	10	14
2024-03-23	6	0	10	226	1	4	1	1	0	0	10	14
2024-03-23	6	0	11	747	1	4	1	1	0	0	10	14
2024-03-23	6	0	12	571	1	4	1	1	0	0	10	14
2024-03-23	6	0	13	402	1	4	1	1	0	0	10	14
2024-03-23	6	0	14	477	1	4	1	1	0	0	10	14
2024-03-23	6	0	15	423	1	4	1	1	0	0	10	14
2024-03-23	6	0	16	438	1	4	1	1	0	0	10	14
2024-03-23	6	0	17	798	1	4	1	1	0	0	10	14
2024-03-23	6	0	18	801	1	4	1	1	0	0	10	14
2024-03-23	6	0	19	511	1	4	1	1	0	0	10	14
2024-03-23	6	0	20	175	1	4	1	1	0	0	10	14
2024-03-23	6	0	21	337	1	4	1	1	0	0	10	14
2024-03-23	6	0	22	550	1	4	1	1	0	0	10	14
2024-03-23	6	0	23	688	1	4	1	1	0	0	10	14
2024-03-24	7	0	0	44	1	4	1	1	0	0	10	10
2024-03-24	7	0	1	43	1	4	1	1	0	0	10	10
2024-03-24	7	0	2	95	1	4	1	1	0	0	10	10
2024-03-24	7	0	3	105	1	4	1	1	0	0	10	10
2024-03-24	7	0	4	110	1	4	1	1	0	0	10	10
2024-03-24	7	0	5	34	1	4	1	1	0	0	10	10
2024-03-24	7	0	6	405	1	4	1	1	0	0	10	10
2024-03-24	7	0	7	580	1	4	1	1	0	0	10	10
2024-03-24	7	0	8	384	1	4	1	1	0	0	10	10
2024-03-24	7	0	9	186	1	4	1	1	0	0	10	10
2024-03-24	7	0	10	487	1	4	1	1	0	0	10	10
2024-03-24	7	0	11	150	1	4	1	1	0	0	10	10
2024-03-24	7	0	12	354	1	4	1	1	0	0	10	10
2024-03-24	7	0	13	296	1	4	1	1	0	0	10	10
2024-03-24	7	0	14	228	1	4	1	1	0	0	10	10
2024-03-24	7	0	15	181	1	4	1	1	0	0	10	10
2024-03-24	7	0	16	375	1	4	1	1	0	0	10	10
2024-03-24	7	0	17	1034	1	4	1	1	0	0	10	10
2024-03-24	7	0	18	1060	1	4	1	1	0	0	10	10
2024-03-24	7	0	19	219	1	4	1	1	0	0	10	10
2024-03-24	7	0	20	339	1	4	1	1	0	0	10	10
2024-03-24	7	0	21	342	1	4	1	1	0	0	10	10
2024-03-24	7	0	22	565	1	4	1	1	0	0	10	10
2024-03-24	7	0	23	156	1	4	1	1	0	0	10	10
2024-03-24	7	0	0	77	0	3	4	1	0	0	7	7
2024-03-24	7	0	1	75	0	3	4	1	0	0	7	7
2024-03-24	7	0	2	97	0	3	4	1	0	0	7	7
2024-03-24	7	0	3	37	0	3	4	1	0	0	7	7
2024-03-24	7	0	4	99	0	3	4	1	0	0	7	7
2024-03-24	7	0	5	44	0	3	4	1	0	0	7	7
2024-03-24	7	0	6	464	0	3	4	1	0	0	7	7
2024-03-24	7	0	7	424	0	3	4	1	0	0	7	7
2024-03-24	7	0	8	233	0	3	4	1	0	0	7	7
2024-03-24	7	0	9	151	0	3	4	1	0	0	7	7
2024-03-24	7	0	10	421	0	3	4	1	0	0	7	7
2024-03-24	7	0	11	372	0	3	4	1	0	0	7	7
2024-03-24	7	0	12	232	0	3	4	1	0	0	7	7
2024-03-24	7	0	13	265	0	3	4	1	0	0	7	7
2024-03-24	7	0	14	481	0	3	4	1	0	0	7	7
2024-03-24	7	0	15	387	0	3	4	1	0	0	7	7
2024-03-24	7	0	16	539	0	3	4	1	0	0	7	7
2024-03-24	7	0	17	719	0	3	4	1	0	0	7	7
2024-03-24	7	0	18	248	0	3	4	1	0	0	7	7
2024-03-24	7	0	19	169	0	3	4	1	0	0	7	7
2024-03-24	7	0	20	335	0	3	4	1	0	0	7	7
2024-03-24	7	0	21	521	0	3	4	1	0	0	7	7
2024-03-24	7	0	22	322	0	3	4	1	0	0	7	7
2024-03-24	7	0	23	407	0	3	4	1	0	0	7	7
2024-03-24	7	0	0	138	1	4	1	1	0	0	10	14
2024-03-24	7	0	1	93	1	4	1	1	0	0	10	14
2024-03-24	7	0	2	44	1	4	1	1	0	0	10	14
2024-03-24	7	0	3	59	1	4	1	1	0	0	10	14
2024-03-24	7	0	4	90	1	4	1	1	0	0	10	14
2024-03-24	7	0	5	72	1	4	1	1	0	0	10	14
2024-03-24	7	0	6	555	1	4	1	1	0	0	10	14
2024-03-24	7	0	7	906	1	4	1	1	0	0	10	14
2024-03-24	7	0	8	825	1	4	1	1	0	0	10	14
2024-03-24	7	0	9	487	1	4	1	1	0	0	10	14
2024-03-24	7	0	10	327	1	4	1	1	0	0	10	14
2024-03-24	7	0	11	700	1	4	1	1	0	0	10	14
2024-03-24	7	0	12	574	1	4	1	1	0	0	10	14
2024-03-24	7	0	13	372	1	4	1	1	0	0	10	14
2024-03-24	7	0	14	306	1	4	1	1	0	0	10	14
2024-03-24	7	0	15	340	1	4	1	1	0	0	10	14
2024-03-24	7	0	16	489	1	4	1	1	0	0	10	14
2024-03-24	7	0	17	657	1	4	1	1	0	0	10	14
2024-03-24	7	0	18	1158	1	4	1	1	0	0	10	14
2024-03-24	7	0	19	571	1	4	1	1	0	0	10	14
2024-03-24	7	0	20	667	1	4	1	1	0	0	10	14
2024-03-24	7	0	21	198	1	4	1	1	0	0	10	14
2024-03-24	7	0	22	477	1	4	1	1	0	0	10	14
2024-03-24	7	0	23	655	1	4	1	1	0	0	10	14
2024-03-25	1	1	0	32	1	4	1	1	0	0	10	10
2024-03-25	1	1	1	32	1	4	1	1	0	0	10	10
2024-03-25	1	1	2	21	1	4	1	1	0	0	10	10
2024-03-25	1	1	3	31	1	4	1	1	0	0	10	10
2024-03-25	1	1	4	63	1	4	1	1	0	0	10	10
2024-03-25	1	1	5	44	1	4	1	1	0	0	10	10
2024-03-25	1	1	6	165	1	4	1	1	0	0	10	10
2024-03-25	1	1	7	208	1	4	1	1	0	0	10	10
2024-03-25	1	1	8	295	1	4	1	1	0	0	10	10
2024-03-25	1	1	9	90	1	4	1	1	0	0	10	10
2024-03-25	1	1	10	355	1	4	1	1	0	0	10	10
2024-03-25	1	1	11	273	1	4	1	1	0	0	10	10
2024-03-25	1	1	12	318	1	4	1	1	0	0	10	10
2024-03-25	1	1	13	182	1	4	1	1	0	0	10	10
2024-03-25	1	1	14	162	1	4	1	1	0	0	10	10
2024-03-25	1	1	15	187	1	4	1	1	0	0	10	10
2024-03-25	1	1	16	110	1	4	1	1	0	0	10	10
2024-03-25	1	1	17	300	1	4	1	1	0	0	10	10
2024-03-25	1	1	18	573	1	4	1	1	0	0	10	10
2024-03-25	1	1	19	97	1	4	1	1	0	0	10	10
2024-03-25	1	1	20	195	1	4	1	1	0	0	10	10
2024-03-25	1	1	21	60	1	4	1	1	0	0	10	10
2024-03-25	1	1	22	244	1	4	1	1	0	0	10	10
2024-03-25	1	1	23	162	1	4	1	1	0	0	10	10
2024-03-25	1	1	0	44	0	3	4	1	0	0	7	7
2024-03-25	1	1	1	24	0	3	4	1	0	0	7	7
2024-03-25	1	1	2	48	0	3	4	1	0	0	7	7
2024-03-25	1	1	3	12	0	3	4	1	0	0	7	7
2024-03-25	1	1	4	46	0	3	4	1	0	0	7	7
2024-03-25	1	1	5	63	0	3	4	1	0	0	7	7
2024-03-25	1	1	6	253	0	3	4	1	0	0	7	7
2024-03-25	1	1	7	635	0	3	4	1	0	0	7	7
2024-03-25	1	1	8	114	0	3	4	1	0	0	7	7
2024-03-25	1	1	9	310	0	3	4	1	0	0	7	7
2024-03-25	1	1	10	323	0	3	4	1	0	0	7	7
2024-03-25	1	1	11	228	0	3	4	1	0	0	7	7
2024-03-25	1	1	12	271	0	3	4	1	0	0	7	7
2024-03-25	1	1	13	122	0	3	4	1	0	0	7	7
2024-03-25	1	1	14	122	0	3	4	1	0	0	7	7
2024-03-25	1	1	15	273	0	3	4	1	0	0	7	7
2024-03-25	1	1	16	293	0	3	4	1	0	0	7	7
2024-03-25	1	1	17	371	0	3	4	1	0	0	7	7
2024-03-25	1	1	18	653	0	3	4	1	0	0	7	7
2024-03-25	1	1	19	179	0	3	4	1	0	0	7	7
2024-03-25	1	1	20	195	0	3	4	1	0	0	7	7
2024-03-25	1	1	21	204	0	3	4	1	0	0	7	7
2024-03-25	1	1	22	205	0	3	4	1	0	0	7	7
2024-03-25	1	1	23	300	0	3	4	1	0	0	7	7
2024-03-25	1	1	0	46	1	4	1	1	0	0	10	14
2024-03-25	1	1	1	54	1	4	1	1	0	0	10	14
2024-03-25	1	1	2	85	1	4	1	1	0	0	10	14
2024-03-25	1	1	3	87	1	4	1	1	0	0	10	14
2024-03-25	1	1	4	35	1	4	1	1	0	0	10	14
2024-03-25	1	1	5	81	1	4	1	1	0	0	10	14
2024-03-25	1	1	6	436	1	4	1	1	0	0	10	14
2024-03-25	1	1	7	240	1	4	1	1	0	0	10	14
2024-03-25	1	1	8	297	1	4	1	1	0	0	10	14
2024-03-25	1	1	9	246	1	4	1	1	0	0	10	14
2024-03-25	1	1	10	208	1	4	1	1	0	0	10	14
2024-03-25	1	1	11	123	1	4	1	1	0	0	10	14
2024-03-25	1	1	12	118	1	4	1	1	0	0	10	14
2024-03-25	1	1	13	237	1	4	1	1	0	0	10	14
2024-03-25	1	1	14	97	1	4	1	1	0	0	10	14
2024-03-25	1	1	15	336	1	4	1	1	0	0	10	14
2024-03-25	1	1	16	87	1	4	1	1	0	0	10	14
2024-03-25	1	1	17	273	1	4	1	1	0	0	10	14
2024-03-25	1	1	18	429	1	4	1	1	0	0	10	14
2024-03-25	1	1	19	211	1	4	1	1	0	0	10	14
2024-03-25	1	1	20	303	1	4	1	1	0	0	10	14
2024-03-25	1	1	21	190	1	4	1	1	0	0	10	14
2024-03-25	1	1	22	313	1	4	1	1	0	0	10	14
2024-03-25	1	1	23	388	1	4	1	1	0	0	10	14
2024-03-26	2	1	0	65	1	4	1	1	0	0	10	10
2024-03-26	2	1	1	54	1	4	1	1	0	0	10	10
2024-03-26	2	1	2	19	1	4	1	1	0	0	10	10
2024-03-26	2	1	3	66	1	4	1	1	0	0	10	10
2024-03-26	2	1	4	49	1	4	1	1	0	0	10	10
2024-03-26	2	1	5	70	1	4	1	1	0	0	10	10
2024-03-26	2	1	6	301	1	4	1	1	0	0	10	10
2024-03-26	2	1	7	578	1	4	1	1	0	0	10	10
2024-03-26	2	1	8	650	1	4	1	1	0	0	10	10
2024-03-26	2	1	9	244	1	4	1	1	0	0	10	10
2024-03-26	2	1	10	306	1	4	1	1	0	0	10	10
2024-03-26	2	1	11	163	1	4	1	1	0	0	10	10
2024-03-26	2	1	12	211	1	4	1	1	0	0	10	10
2024-03-26	2	1	13	355	1	4	1	1	0	0	10	10
2024-03-26	2	1	14	63	1	4	1	1	0	0	10	10
2024-03-26	2	1	15	66	1	4	1	1	0	0	10	10
2024-03-26	2	1	16	141	1	4	1	1	0	0	10	10
2024-03-26	2	1	17	463	1	4	1	1	0	0	10	10
2024-03-26	2	1	18	223	1	4	1	1	0	0	10	10
2024-03-26	2	1	19	334	1	4	1	1	0	0	10	10
2024-03-26	2	1	20	336	1	4	1	1	0	0	10	10
2024-03-26	2	1	21	75	1	4	1	1	0	0	10	10
2024-03-26	2	1	22	122	1	4	1	1	0	0	10	10
2024-03-26	2	1	23	192	1	4	1	1	0	0	10	10
2024-03-26	2	1	0	61	0	3	4	1	0	0	7	7
2024-03-26	2	1	1	48	0	3	4	1	0	0	7	7
2024-03-26	2	1	2	41	0	3	4	1	0	0	7	7
2024-03-26	2	1	3	33	0	3	4	1	0	0	7	7
2024-03-26	2	1	4	15	0	3	4	1	0	0	7	7
2024-03-26	2	1	5	38	0	3	4	1	0	0	7	7
2024-03-26	2	1	6	125	0	3	4	1	0	0	7	7
2024-03-26	2	1	7	338	0	3	4	1	0	0	7	7
2024-03-26	2	1	8	354	0	3	4	1	0	0	7	7
2024-03-26	2	1	9	166	0	3	4	1	0	0	7	7
2024-03-26	2	1	10	217	0	3	4	1	0	0	7	7
2024-03-26	2	1	11	237	0	3	4	1	0	0	7	7
2024-03-26	2	1	12	170	0	3	4	1	0	0	7	7
2024-03-26	2	1	13	286	0	3	4	1	0	0	7	7
2024-03-26	2	1	14	107	0	3	4	1	0	0	7	7
2024-03-26	2	1	15	62	0	3	4	1	0	0	7	7
2024-03-26	2	1	16	163	0	3	4	1	0	0	7	7
2024-03-26	2	1	17	123	0	3	4	1	0	0	7	7
2024-03-26	2	1	18	497	0	3	4	1	0	0	7	7
2024-03-26	2	1	19	129	0	3	4	1	0	0	7	7
2024-03-26	2	1	20	283	0	3	4	1	0	0	7	7
2024-03-26	2	1	21	211	0	3	4	1	0	0	7	7
2024-03-26	2	1	22	63	0	3	4	1	0	0	7	7
2024-03-26	2	1	23	221	0	3	4	1	0	0	7	7
2024-03-26	2	1	0	56	1	4	1	1	0	0	10	14
2024-03-26	2	1	1	56	1	4	1	1	0	0	10	14
2024-03-26	2	1	2	54	1	4	1	1	0	0	10	14
2024-03-26	2	1	3	70	1	4	1	1	0	0	10	14
2024-03-26	2	1	4	78	1	4	1	1	0	0	10	14
2024-03-26	2	1	5	33	1	4	1	1	0	0	10	14
2024-03-26	2	1	6	426	1	4	1	1	0	0	10	14
2024-03-26	2	1	7	879	1	4	1	1	0	0	10	14
2024-03-26	2	1	8	150	1	4	1	1	0	0	10	14
2024-03-26	2	1	9	427	1	4	1	1	0	0	10	14
2024-03-26	2	1	10	118	1	4	1	1	0	0	10	14
2024-03-26	2	1	11	105	1	4	1	1	0	0	10	14
2024-03-26	2	1	12	439	1	4	1	1	0	0	10	14
2024-03-26	2	1	13	202	1	4	1	1	0	0	10	14
2024-03-26	2	1	14	136	1	4	1	1	0	0	10	14
2024-03-26	2	1	15	156	1	4	1	1	0	0	10	14
2024-03-26	2	1	16	324	1	4	1	1	0	0	10	14
2024-03-26	2	1	17	402	1	4	1	1	0	0	10	14
2024-03-26	2	1	18	480	1	4	1	1	0	0	10	14
2024-03-26	2	1	19	157	1	4	1	1	0	0	10	14
2024-03-26	2	1	20	445	1	4	1	1	0	0	10	14
2024-03-26	2	1	21	445	1	4	1	1	0	0	10	14
2024-03-26	2	1	22	138	1	4	1	1	0	0	10	14
2024-03-26	2	1	23	274	1	4	1	1	0	0	10	14
2024-03-27	3	1	0	27	1	4	1	1	0	0	10	10
2024-03-27	3	1	1	18	1	4	1	1	0	0	10	10
2024-03-27	3	1	2	13	1	4	1	1	0	0	10	10
2024-03-27	3	1	3	13	1	4	1	1	0	0	10	10
2024-03-27	3	1	4	39	1	4	1	1	0	0	10	10
2024-03-27	3	1	5	64	1	4	1	1	0	0	10	10
2024-03-27	3	1	6	352	1	4	1	1	0	0	10	10
2024-03-27	3	1	7	708	1	4	1	1	0	0	10	10
2024-03-27	3	1	8	170	1	4	1	1	0	0	10	10
2024-03-27	3	1	9	268	1	4	1	1	0	0	10	10
2024-03-27	3	1	10	315	1	4	1	1	0	0	10	10
2024-03-27	3	1	11	279	1	4	1	1	0	0	10	10
2024-03-27	3	1	12	332	1	4	1	1	0	0	10	10
2024-03-27	3	1	13	320	1	4	1	1	0	0	10	10
2024-03-27	3	1	14	274	1	4	1	1	0	0	10	10
2024-03-27	3	1	15	205	1	4	1	1	0	0	10	10
2024-03-27	3	1	16	356	1	4	1	1	0	0	10	10
2024-03-27	3	1	17	640	1	4	1	1	0	0	10	10
2024-03-27	3	1	18	410	1	4	1	1	0	0	10	10
2024-03-27	3	1	19	165	1	4	1	1	0	0	10	10
2024-03-27	3	1	20	193	1	4	1	1	0	0	10	10
2024-03-27	3	1	21	301	1	4	1	1	0	0	10	10
2024-03-27	3	1	22	230	1	4	1	1	0	0	10	10
2024-03-27	3	1	23	355	1	4	1	1	0	0	10	10
2024-03-27	3	1	0	51	0	3	4	1	0	0	7	7
2024-03-27	3	1	1	18	0	3	4	1	0	0	7	7
2024-03-27	3	1	2	48	0	3	4	1	0	0	7	7
2024-03-27	3	1	3	39	0	3	4	1	0	0	7	7
2024-03-27	3	1	4	44	0	3	4	1	0	0	7	7
2024-03-27	3	1	5	35	0	3	4	1	0	0	7	7
2024-03-27	3	1	6	313	0	3	4	1	0	0	7	7
2024-03-27	3	1	7	633	0	3	4	1	0	0	7	7
2024-03-27	3	1	8	323	0	3	4	1	0	0	7	7
2024-03-27	3	1	9	145	0	3	4	1	0	0	7	7
2024-03-27	3	1	10	255	0	3	4	1	0	0	7	7
2024-03-27	3	1	11	224	0	3	4	1	0	0	7	7
2024-03-27	3	1	12	293	0	3	4	1	0	0	7	7
2024-03-27	3	1	13	260	0	3	4	1	0	0	7	7
2024-03-27	3	1	14	330	0	3	4	1	0	0	7	7
2024-03-27	3	1	15	117	0	3	4	1	0	0	7	7
2024-03-27	3	1	16	177	0	3	4	1	0	0	7	7
2024-03-27	3	1	17	519	0	3	4	1	0	0	7	7
2024-03-27	3	1	18	360	0	3	4	1	0	0	7	7
2024-03-27	3	1	19	303	0	3	4	1	0	0	7	7
2024-03-27	3	1	20	147	0	3	4	1	0	0	7	7
2024-03-27	3	1	21	97	0	3	4	1	0	0	7	7
2024-03-27	3	1	22	71	0	3	4	1	0	0	7	7
2024-03-27	3	1	23	203	0	3	4	1	0	0	7	7
2024-03-27	3	1	0	38	1	4	1	1	0	0	10	14
2024-03-27	3	1	1	86	1	4	1	1	0	0	10	14
2024-03-27	3	1	2	31	1	4	1	1	0	0	10	14
2024-03-27	3	1	3	34	1	4	1	1	0	0	10	14
2024-03-27	3	1	4	15	1	4	1	1	0	0	10	14
2024-03-27	3	1	5	36	1	4	1	1	0	0	10	14
2024-03-27	3	1	6	114	1	4	1	1	0	0	10	14
2024-03-27	3	1	7	516	1	4	1	1	0	0	10	14
2024-03-27	3	1	8	474	1	4	1	1	0	0	10	14
2024-03-27	3	1	9	259	1	4	1	1	0	0	10	14
2024-03-27	3	1	10	351	1	4	1	1	0	0	10	14
2024-03-27	3	1	11	372	1	4	1	1	0	0	10	14
2024-03-27	3	1	12	300	1	4	1	1	0	0	10	14
2024-03-27	3	1	13	270	1	4	1	1	0	0	10	14
2024-03-27	3	1	14	93	1	4	1	1	0	0	10	14
2024-03-27	3	1	15	102	1	4	1	1	0	0	10	14
2024-03-27	3	1	16	253	1	4	1	1	0	0	10	14
2024-03-27	3	1	17	738	1	4	1	1	0	0	10	14
2024-03-27	3	1	18	162	1	4	1	1	0	0	10	14
2024-03-27	3	1	19	147	1	4	1	1	0	0	10	14
2024-03-27	3	1	20	139	1	4	1	1	0	0	10	14
2024-03-27	3	1	21	244	1	4	1	1	0	0	10	14
2024-03-27	3	1	22	439	1	4	1	1	0	0	10	14
2024-03-27	3	1	23	393	1	4	1	1	0	0	10	14
2024-03-28	4	1	0	41	1	4	1	1	0	0	10	10
2024-03-28	4	1	1	32	1	4	1	1	0	0	10	10
2024-03-28	4	1	2	70	1	4	1	1	0	0	10	10
2024-03-28	4	1	3	44	1	4	1	1	0	0	10	10
2024-03-28	4	1	4	25	1	4	1	1	0	0	10	10
2024-03-28	4	1	5	50	1	4	1	1	0	0	10	10
2024-03-28	4	1	6	231	1	4	1	1	0	0	10	10
2024-03-28	4	1	7	228	1	4	1	1	0	0	10	10
2024-03-28	4	1	8	583	1	4	1	1	0	0	10	10
2024-03-28	4	1	9	175	1	4	1	1	0	0	10	10
2024-03-28	4	1	10	189	1	4	1	1	0	0	10	10
2024-03-28	4	1	11	306	1	4	1	1	0	0	10	10
2024-03-28	4	1	12	63	1	4	1	1	0	0	10	10
2024-03-28	4	1	13	279	1	4	1	1	0	0	10	10
2024-03-28	4	1	14	284	1	4	1	1	0	0	10	10
2024-03-28	4	1	15	210	1	4	1	1	0	0	10	10
2024-03-28	4	1	16	100	1	4	1	1	0	0	10	10
2024-03-28	4	1	17	153	1	4	1	1	0	0	10	10
2024-03-28	4	1	18	465	1	4	1	1	0	0	10	10
2024-03-28	4	1	19	76	1	4	1	1	0	0	10	10
2024-03-28	4	1	20	298	1	4	1	1	0	0	10	10
2024-03-28	4	1	21	159	1	4	1	1	0	0	10	10
2024-03-28	4	1	22	212	1	4	1	1	0	0	10	10
2024-03-28	4	1	23	289	1	4	1	1	0	0	10	10
2024-03-28	4	1	0	37	0	3	4	1	0	0	7	7
2024-03-28	4	1	1	52	0	3	4	1	0	0	7	7
2024-03-28	4	1	2	12	0	3	4	1	0	0	7	7
2024-03-28	4	1	3	55	0	3	4	1	0	0	7	7
2024-03-28	4	1	4	28	0	3	4	1	0	0	7	7
2024-03-28	4	1	5	55	0	3	4	1	0	0	7	7
2024-03-28	4	1	6	66	0	3	4	1	0	0	7	7
2024-03-28	4	1	7	345	0	3	4	1	0	0	7	7
2024-03-28	4	1	8	400	0	3	4	1	0	0	7	7
2024-03-28	4	1	9	227	0	3	4	1	0	0	7	7
2024-03-28	4	1	10	168	0	3	4	1	0	0	7	7
2024-03-28	4	1	11	279	0	3	4	1	0	0	7	7
2024-03-28	4	1	12	116	0	3	4	1	0	0	7	7
2024-03-28	4	1	13	310	0	3	4	1	0	0	7	7
2024-03-28	4	1	14	304	0	3	4	1	0	0	7	7
2024-03-28	4	1	15	130	0	3	4	1	0	0	7	7
2024-03-28	4	1	16	174	0	3	4	1	0	0	7	7
2024-03-28	4	1	17	598	0	3	4	1	0	0	7	7
2024-03-28	4	1	18	635	0	3	4	1	0	0	7	7
2024-03-28	4	1	19	192	0	3	4	1	0	0	7	7
2024-03-28	4	1	20	246	0	3	4	1	0	0	7	7
2024-03-28	4	1	21	270	0	3	4	1	0	0	7	7
2024-03-28	4	1	22	75	0	3	4	1	0	0	7	7
2024-03-28	4	1	23	135	0	3	4	1	0	0	7	7
2024-03-28	4	1	0	60	1	4	1	1	0	0	10	14
2024-03-28	4	1	1	73	1	4	1	1	0	0	10	14
2024-03-28	4	1	2	84	1	4	1	1	0	0	10	14
2024-03-28	4	1	3	39	1	4	1	1	0	0	10	14
2024-03-28	4	1	4	85	1	4	1	1	0	0	10	14
2024-03-28	4	1	5	46	1	4	1	1	0	0	10	14
2024-03-28	4	1	6	157	1	4	1	1	0	0	10	14
[truncated: 233 more rows]
